# Supplementary material for: Early vertebrate chromosome duplications and the evolution of the neuropeptide Y receptor gene regions
Source: Springer Nature journal article supplement (doi:10.1186/1471-2148-8-184), 2008-06-25

ABLIM QP

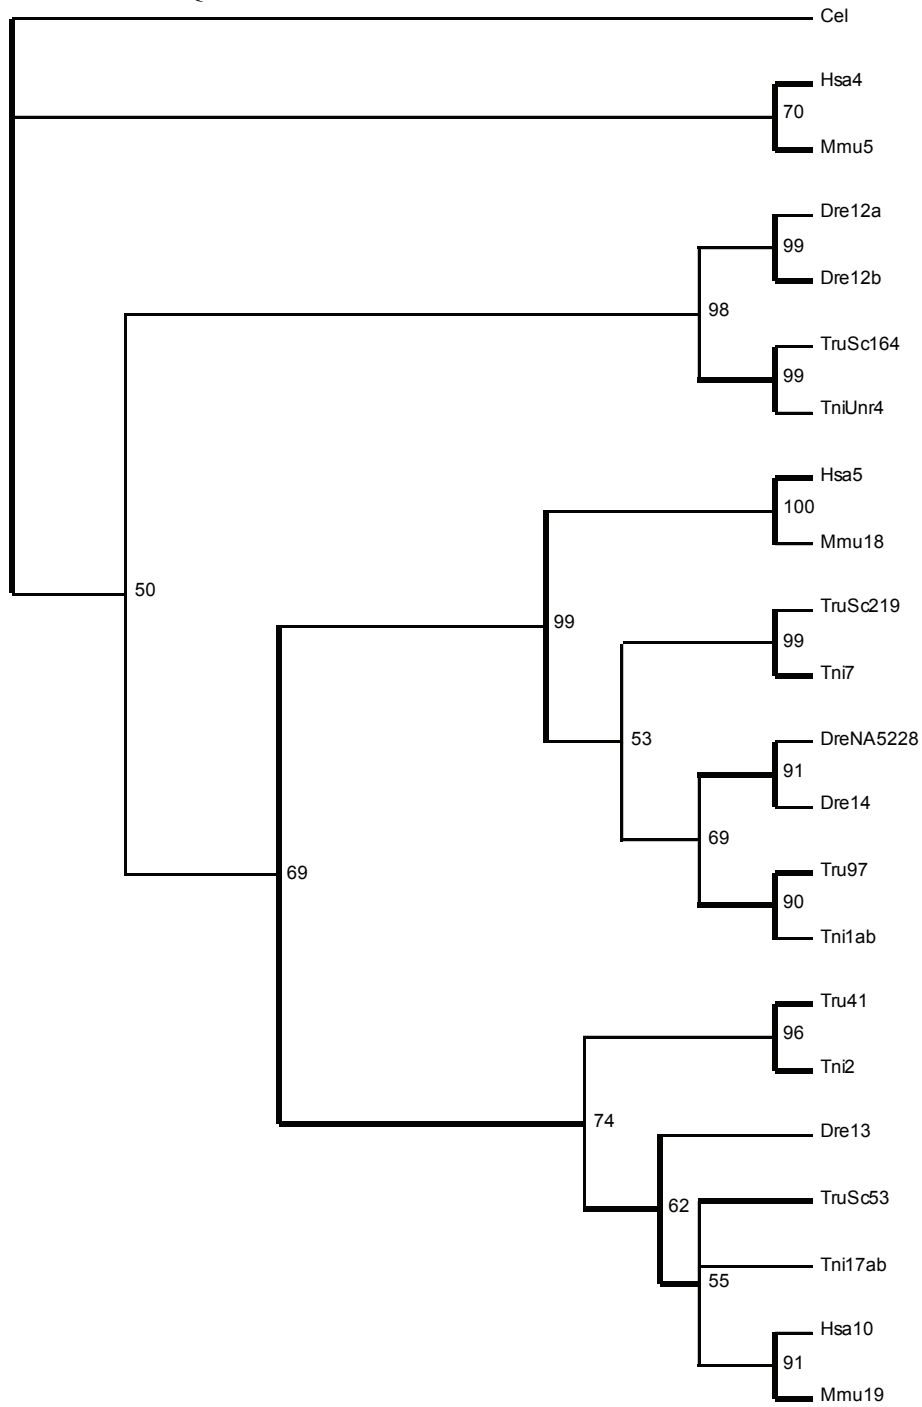

ADAMTS QP

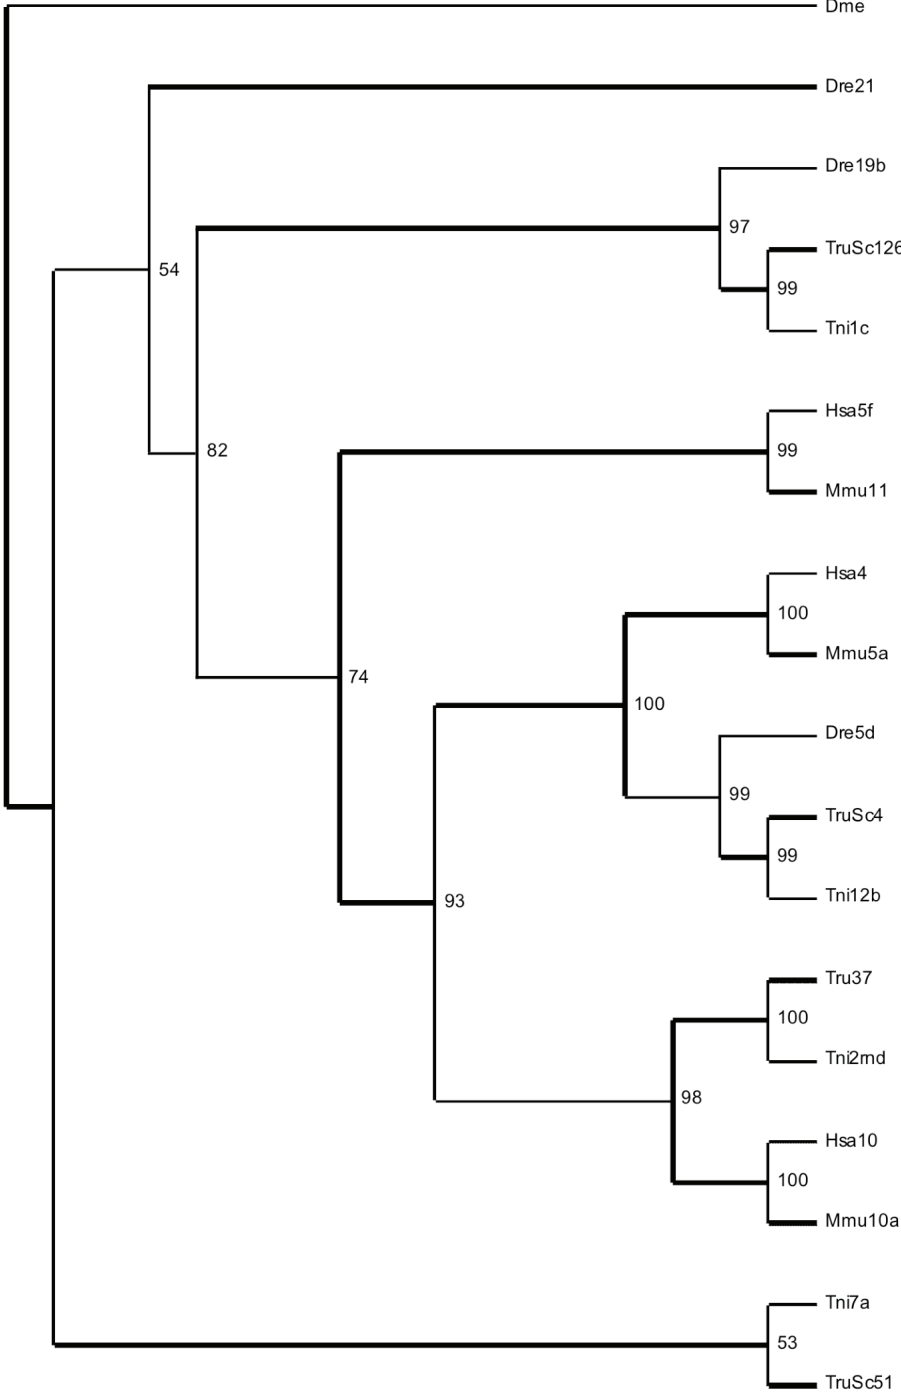

Ankyrin QP

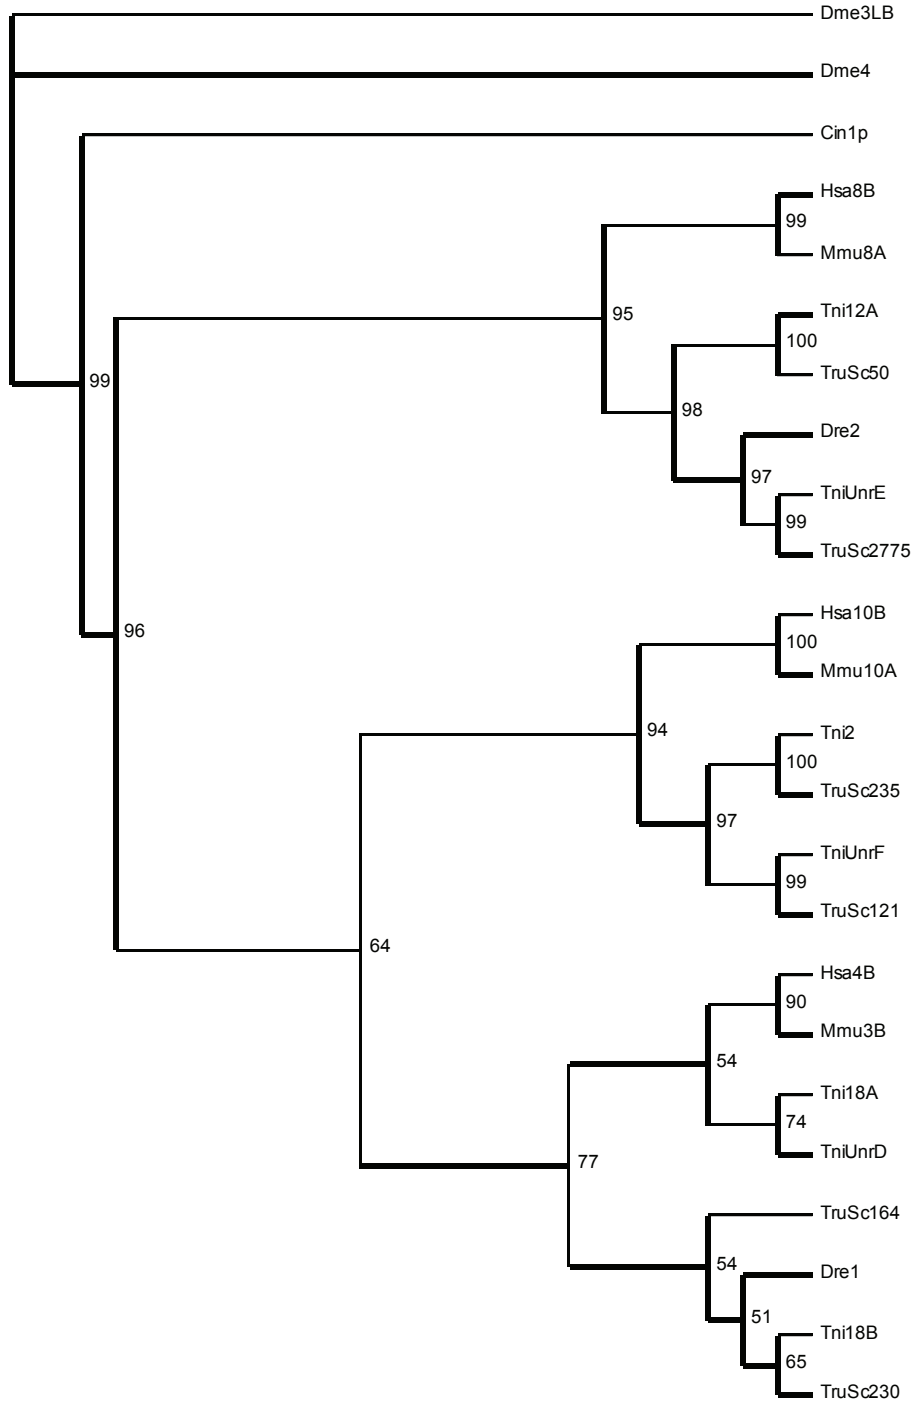

ANX

QP

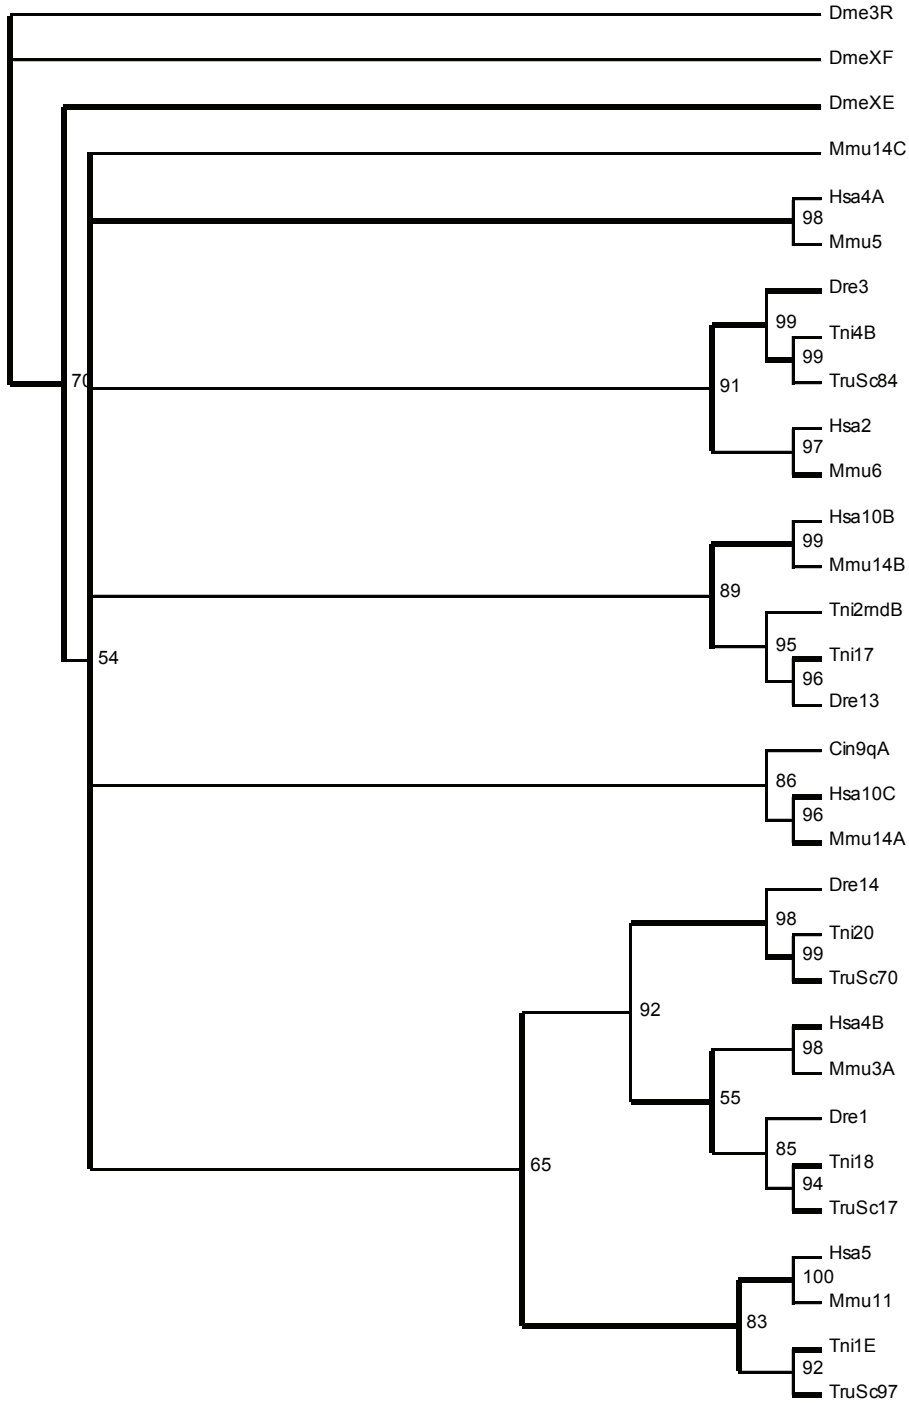

AP3

QP

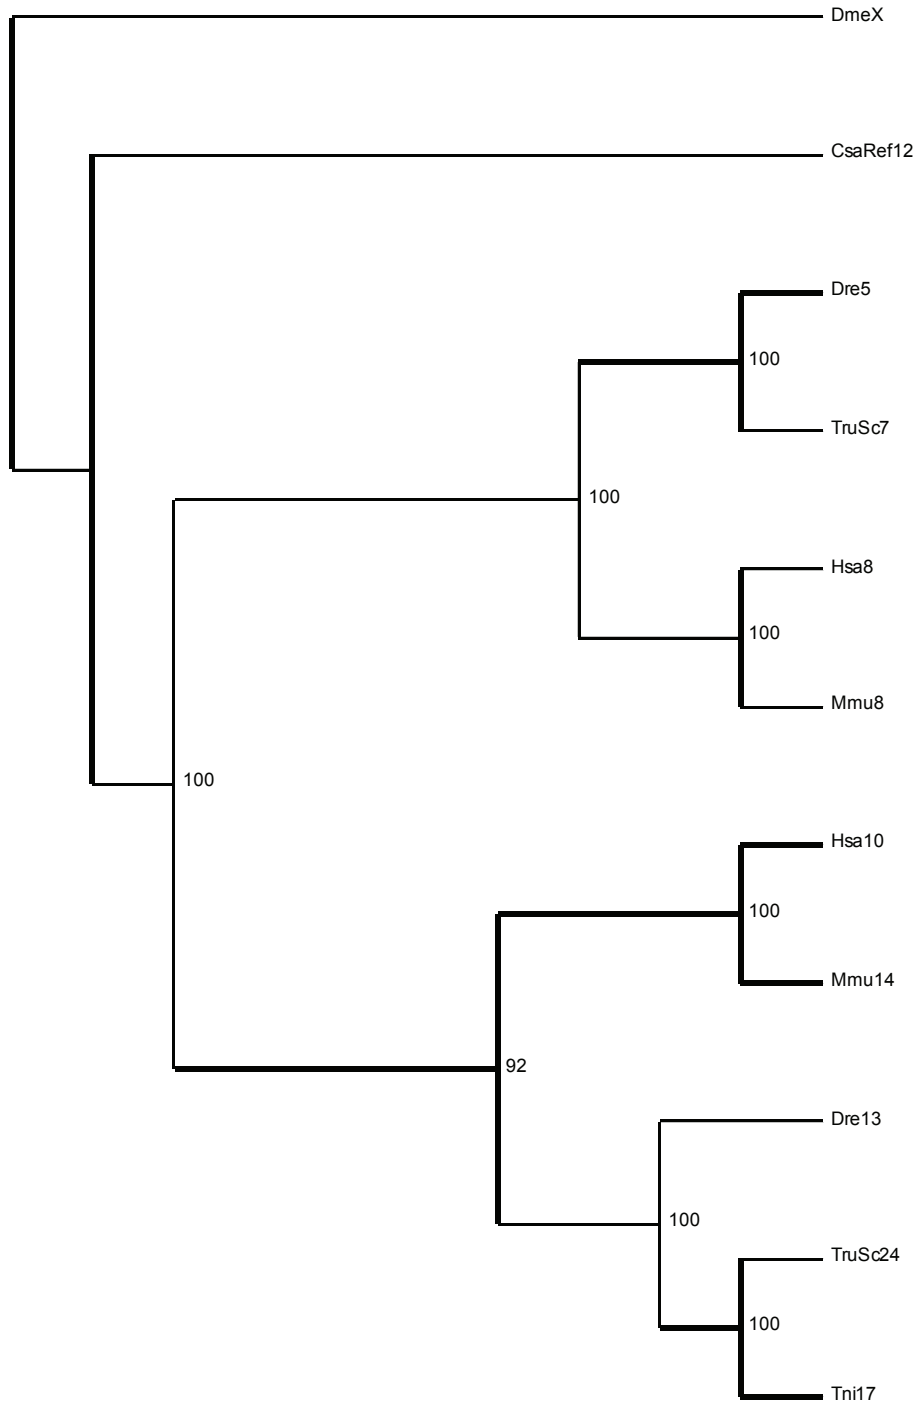

CNNM1 QP

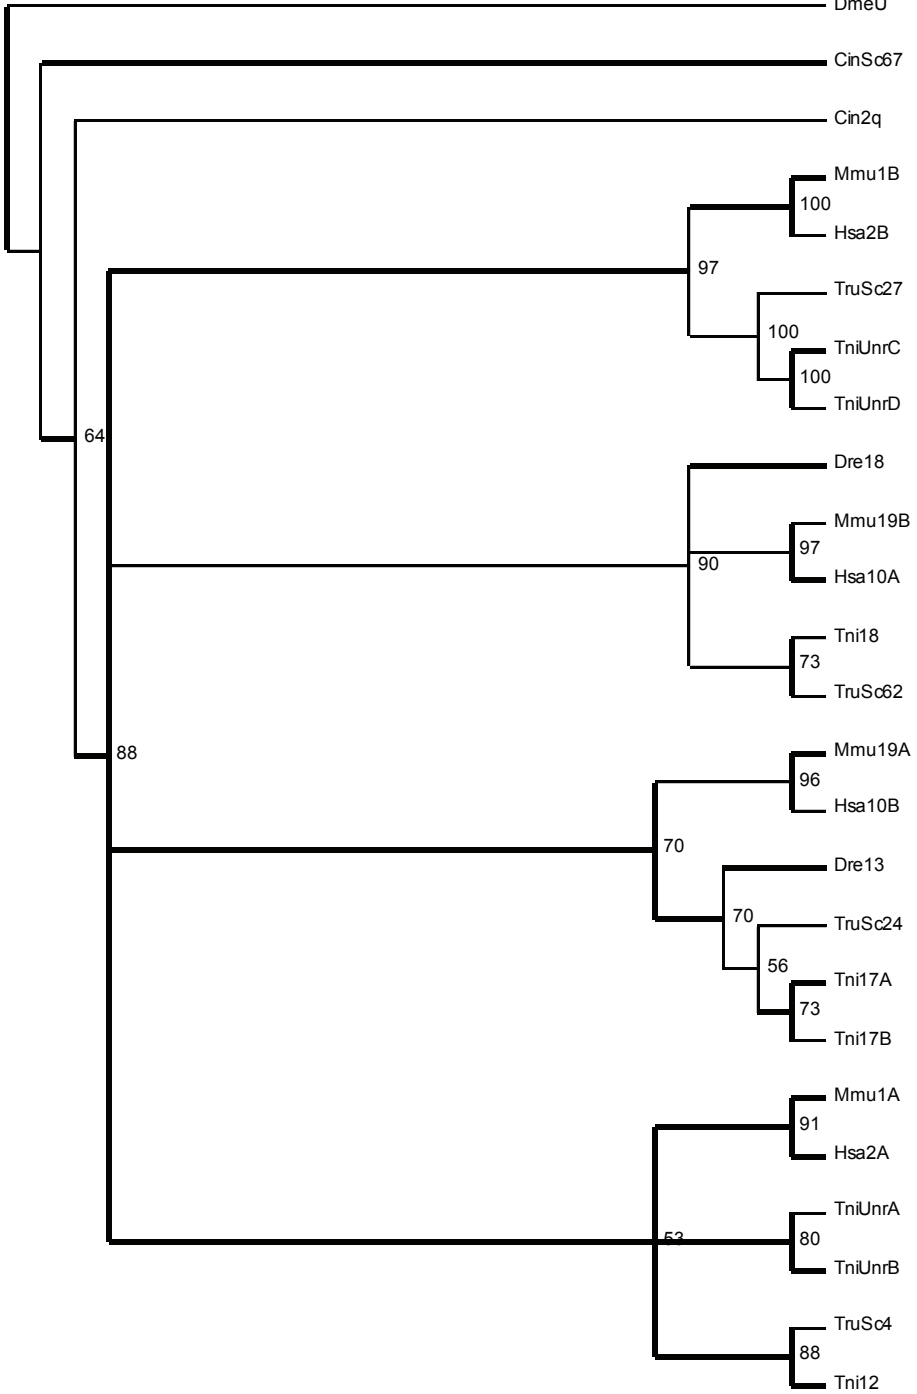

DUSP

QP

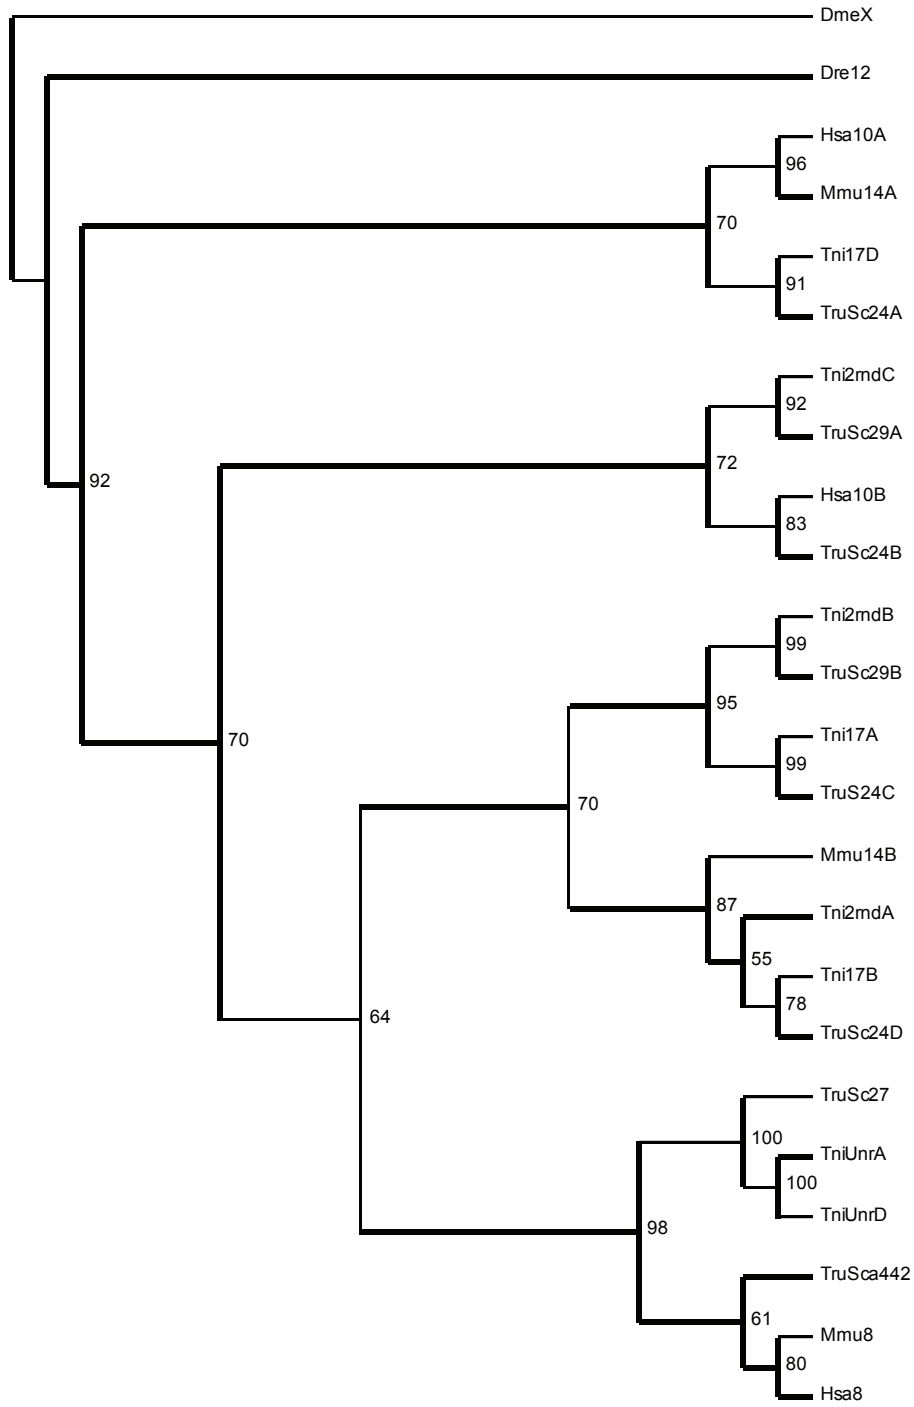

FGFR

QP

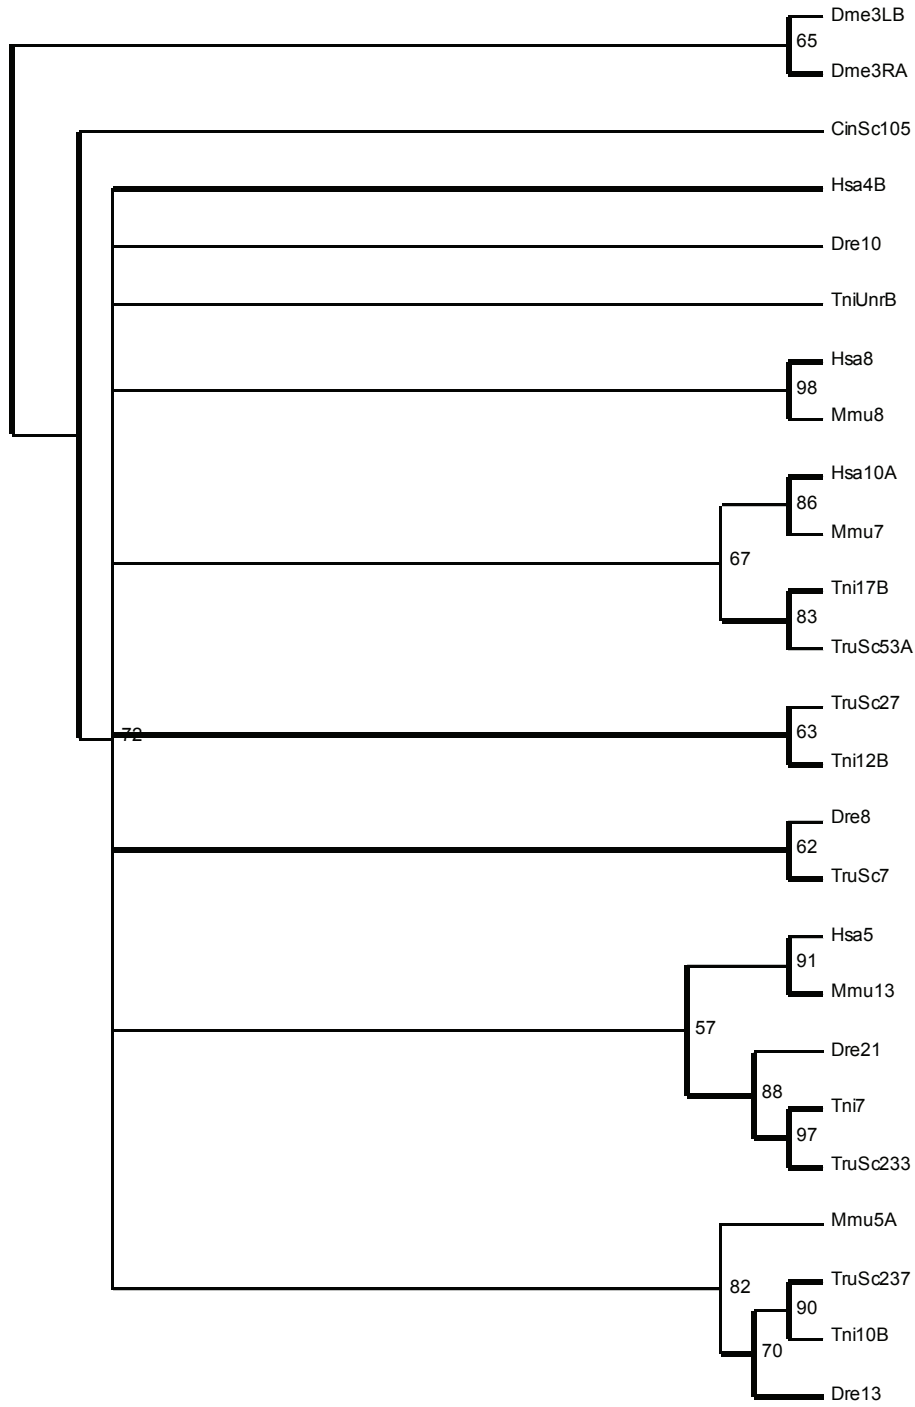



HNRNP QP

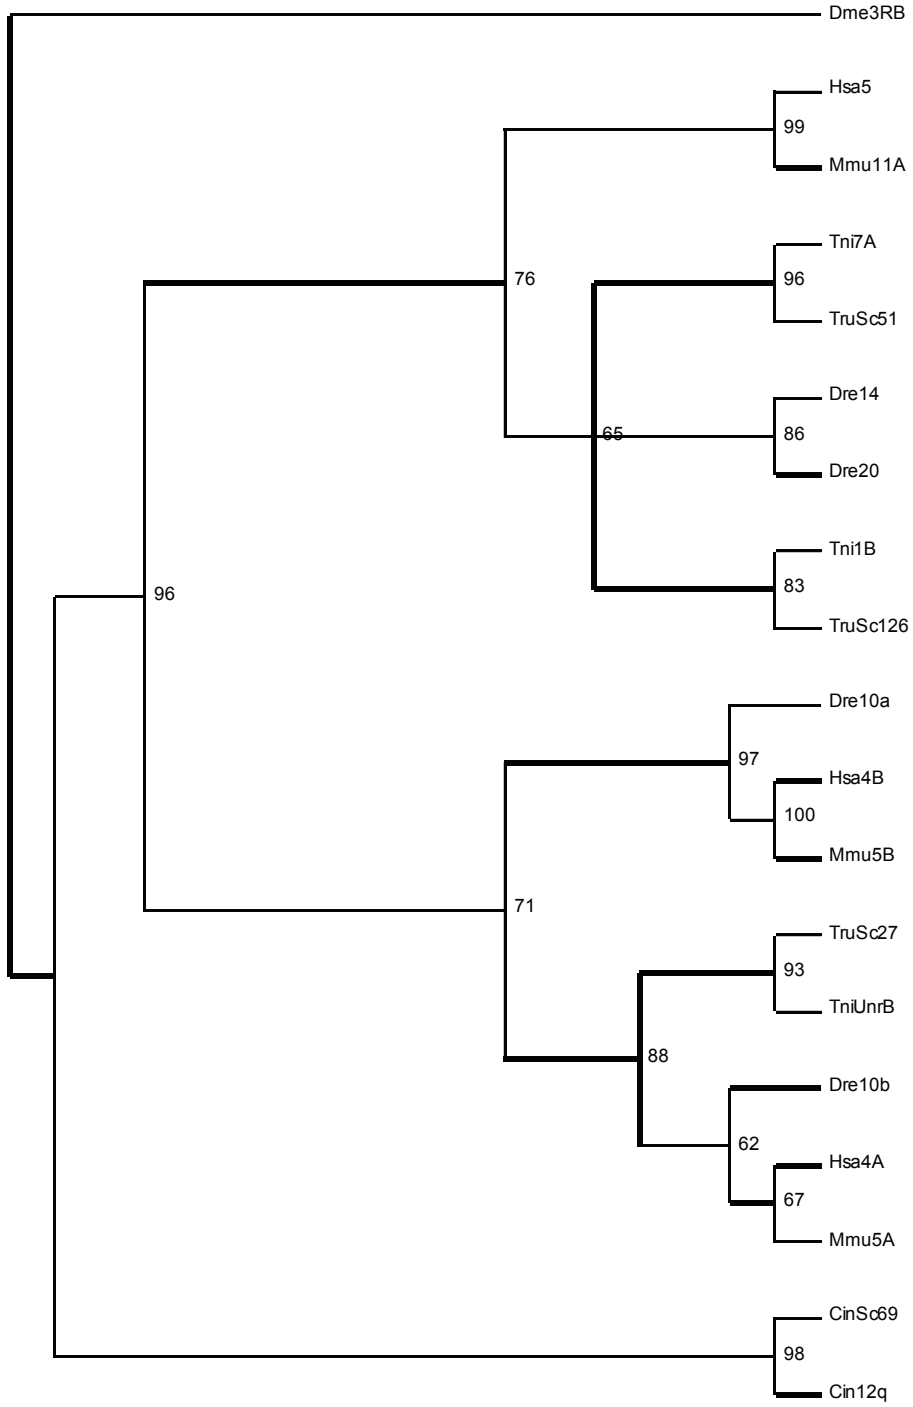

LGI

QP

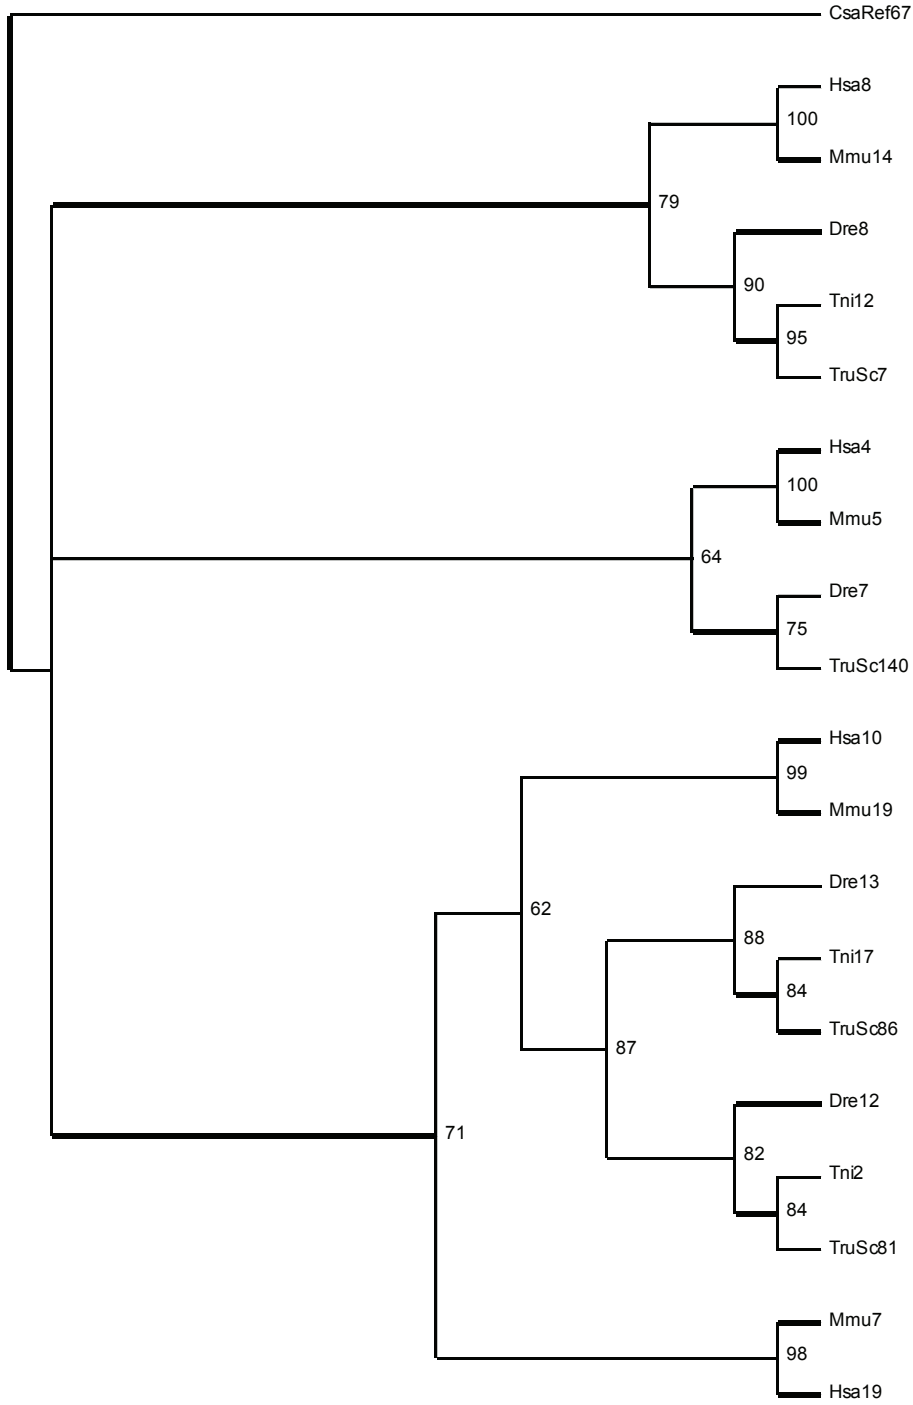

MAX

QP

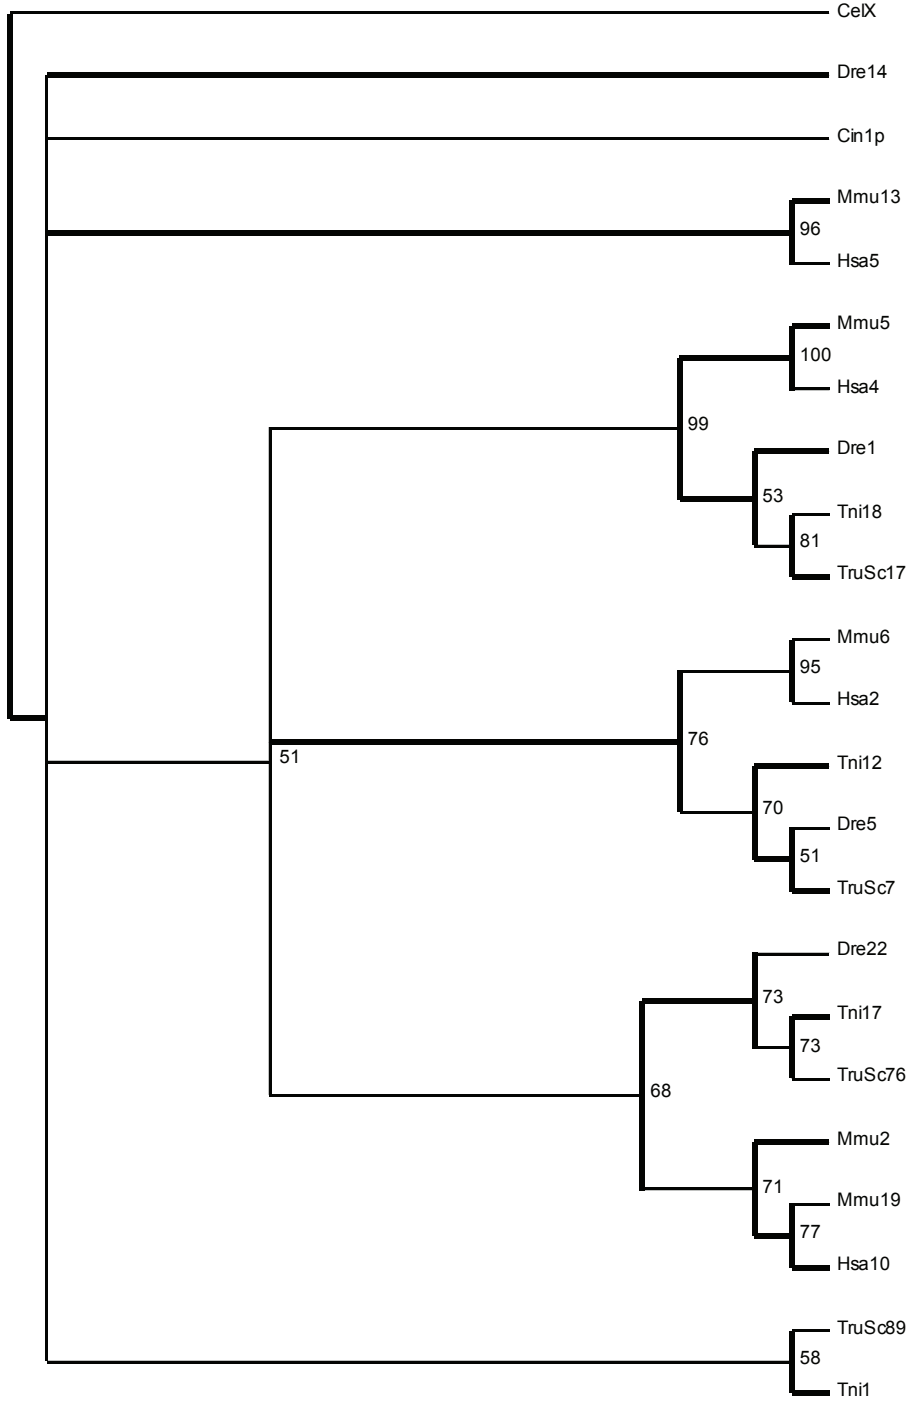

Mitogen QP

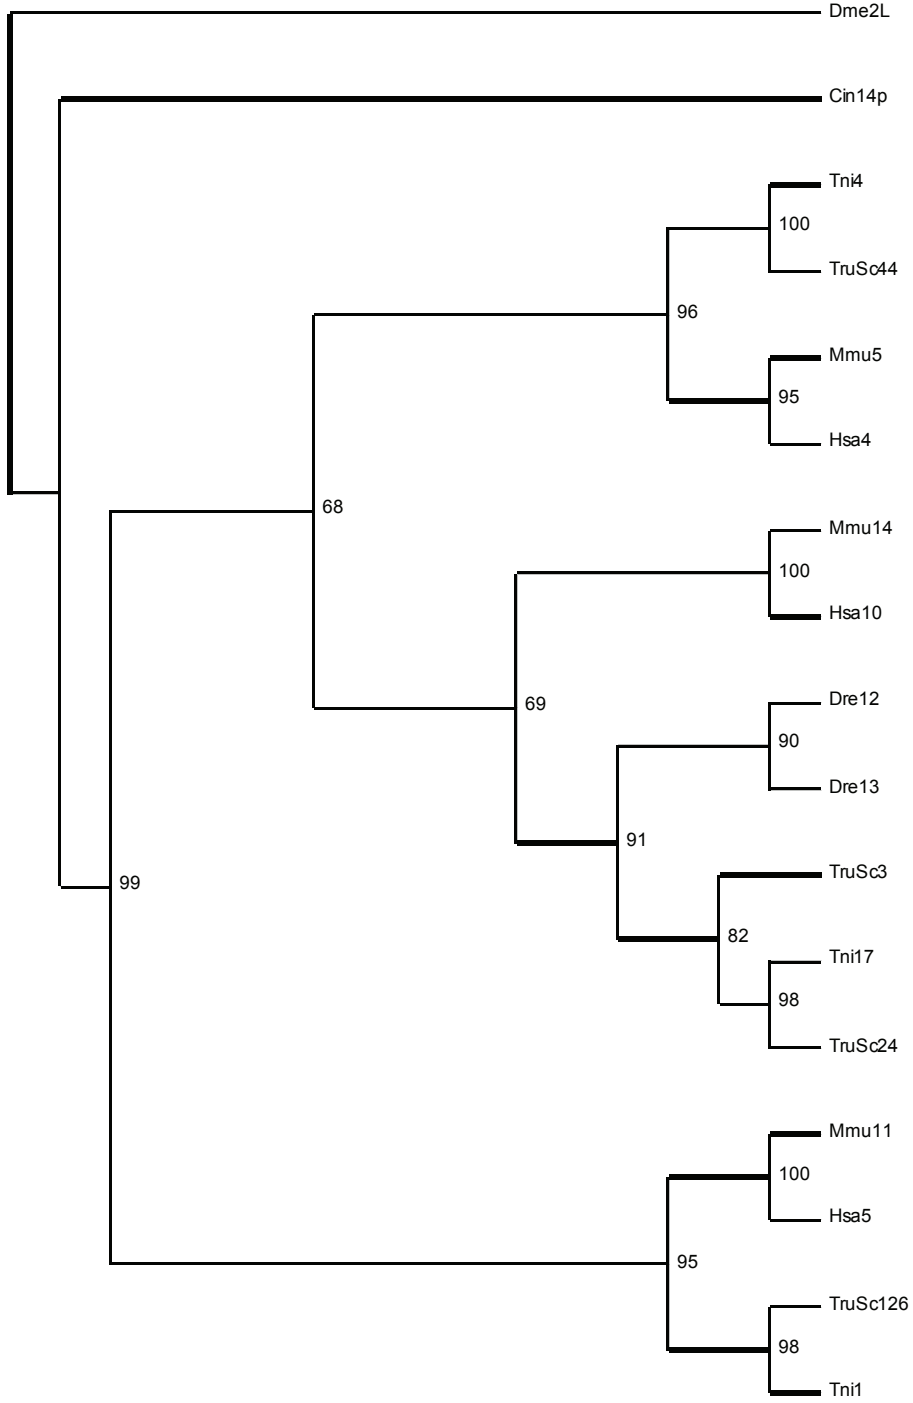

NEF

QP

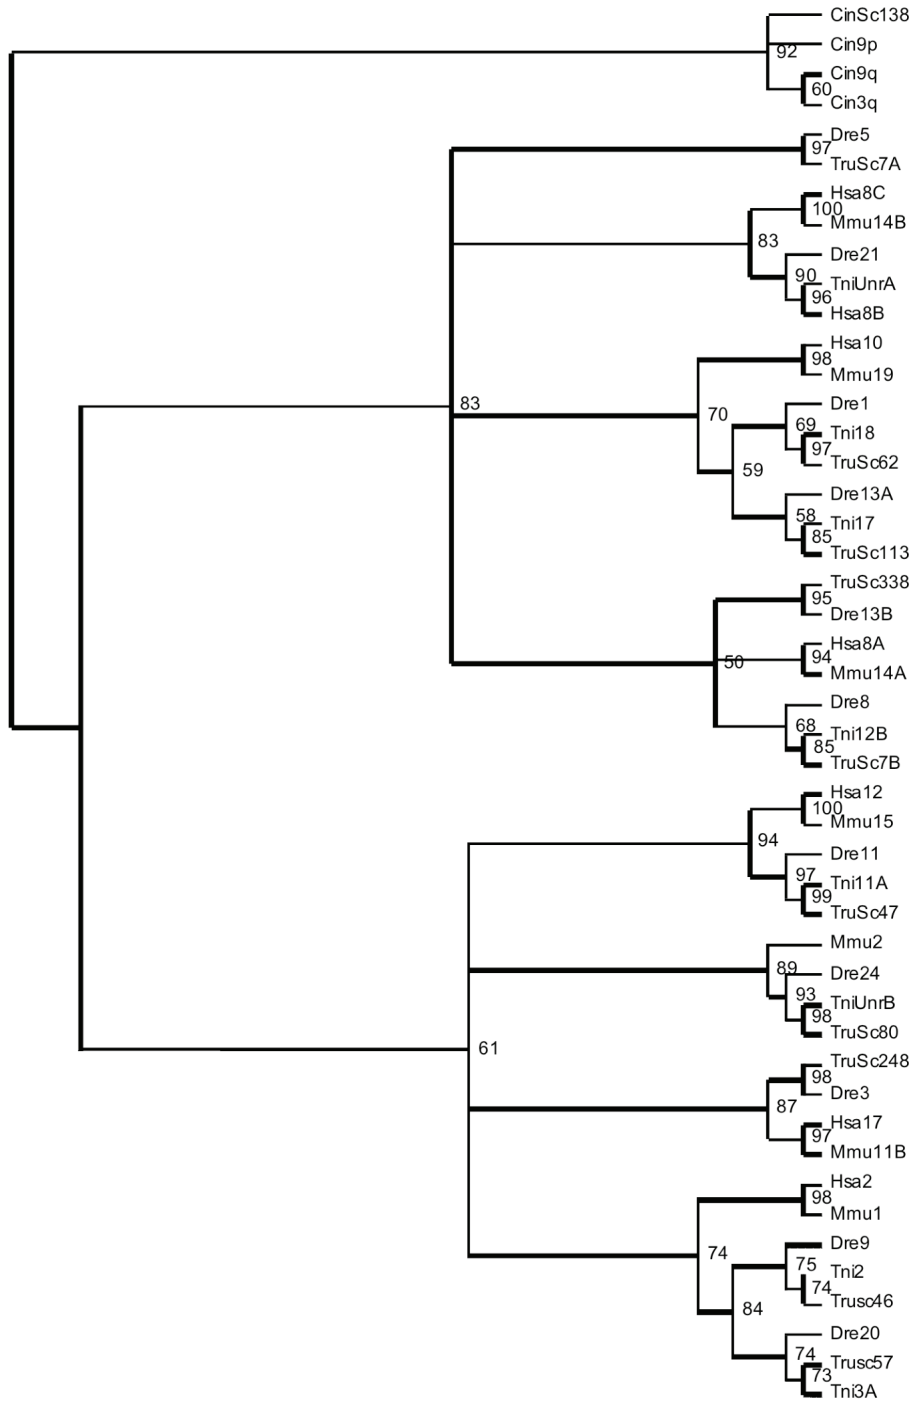

NKR

QP

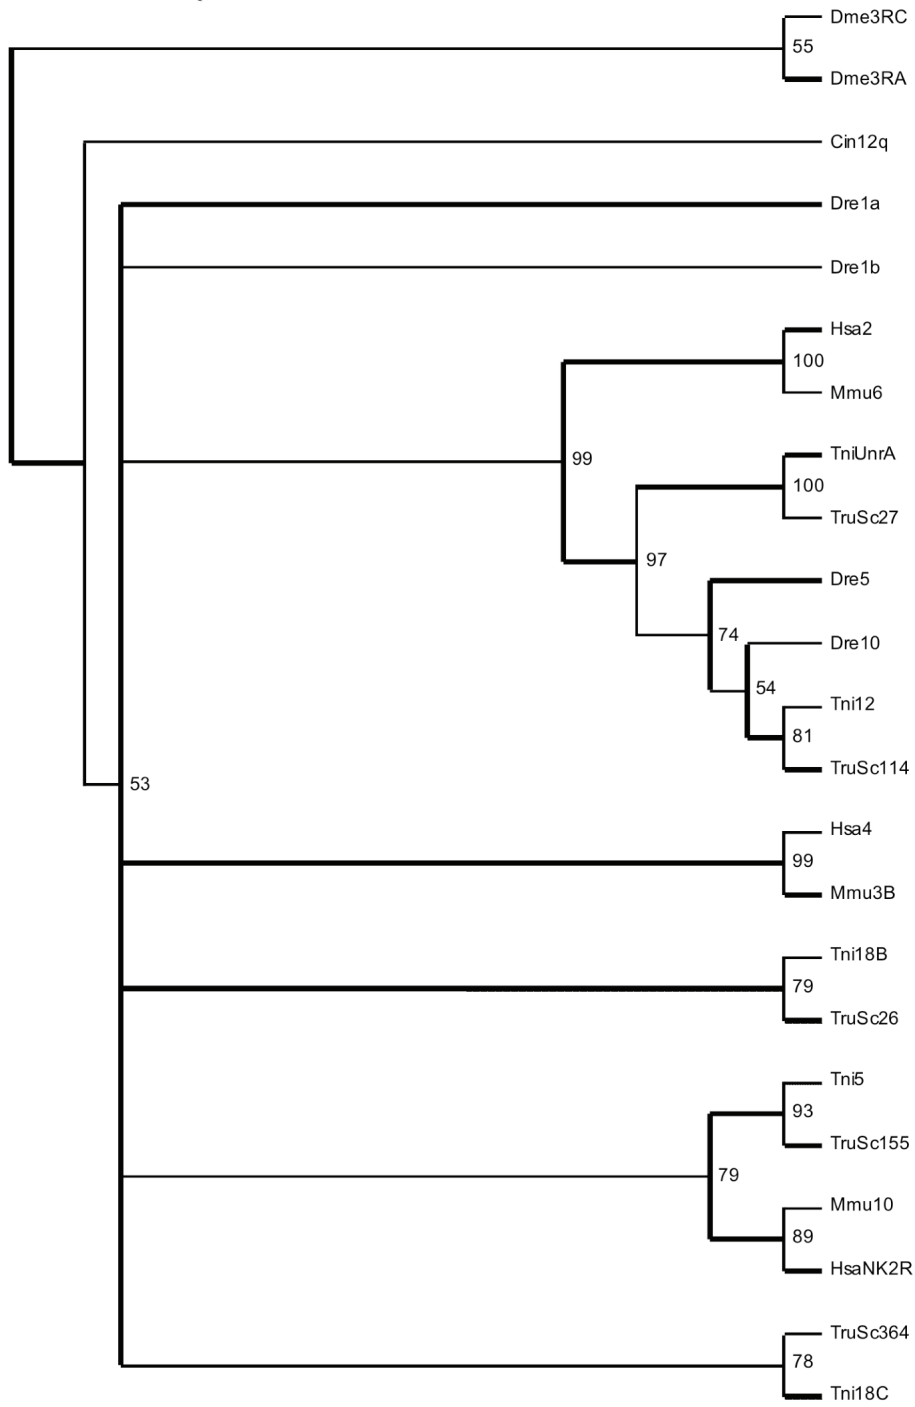

Oxoglut

QP

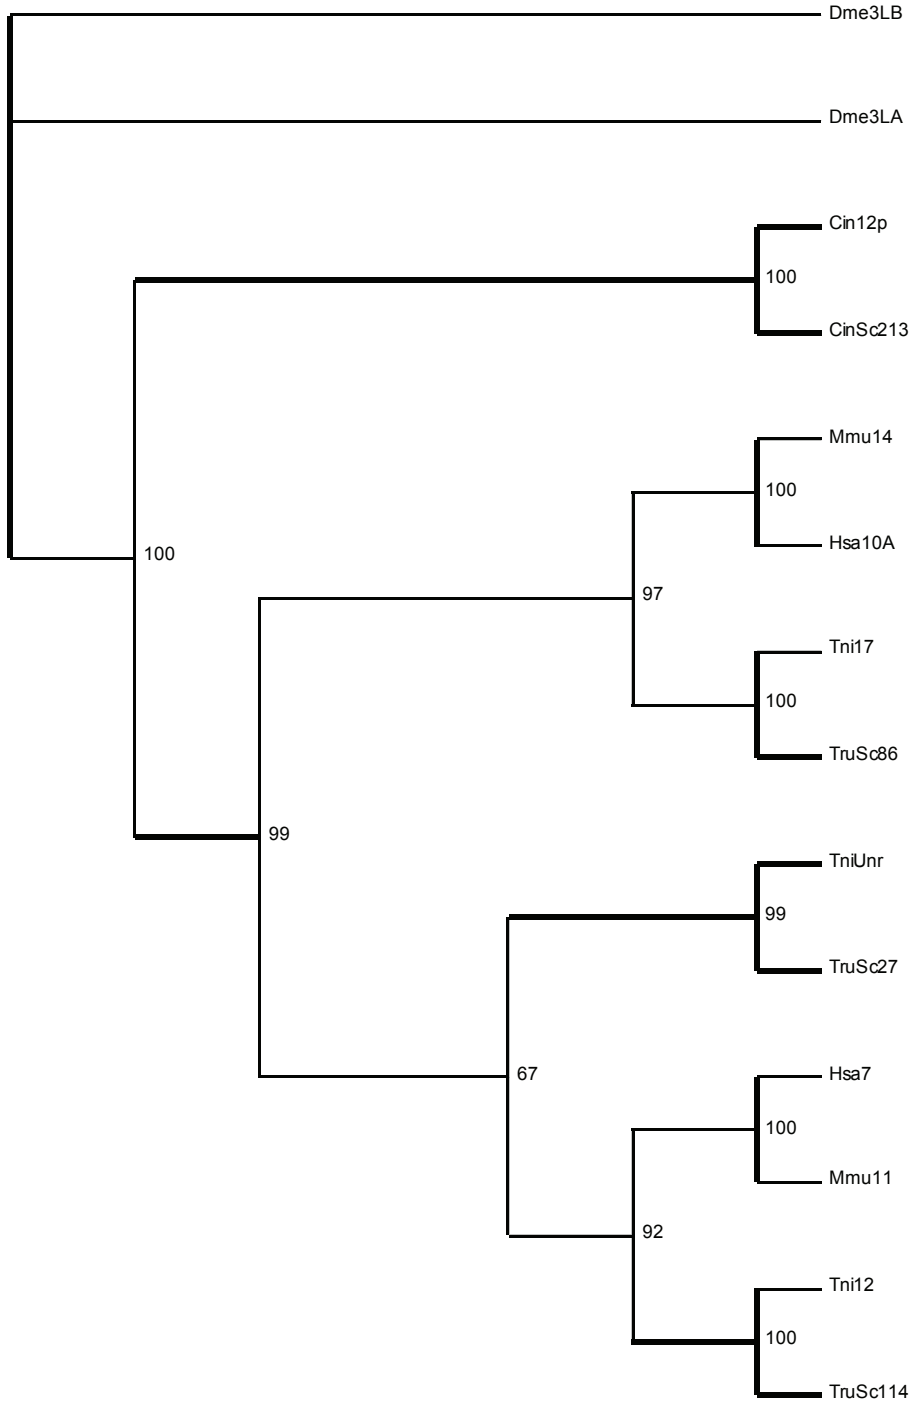

PDLIM3 QP

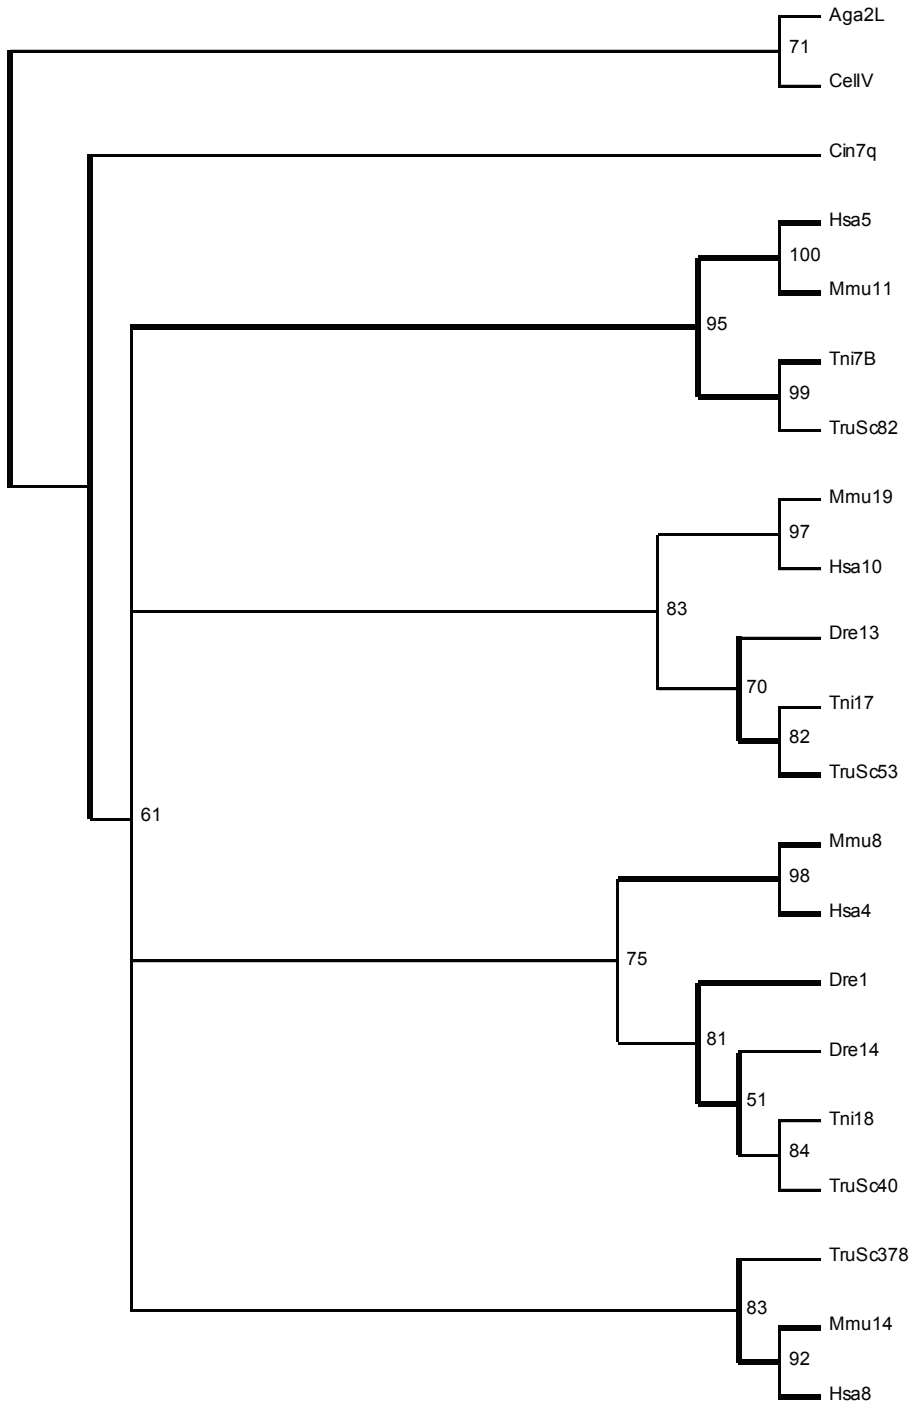



PX19

QP

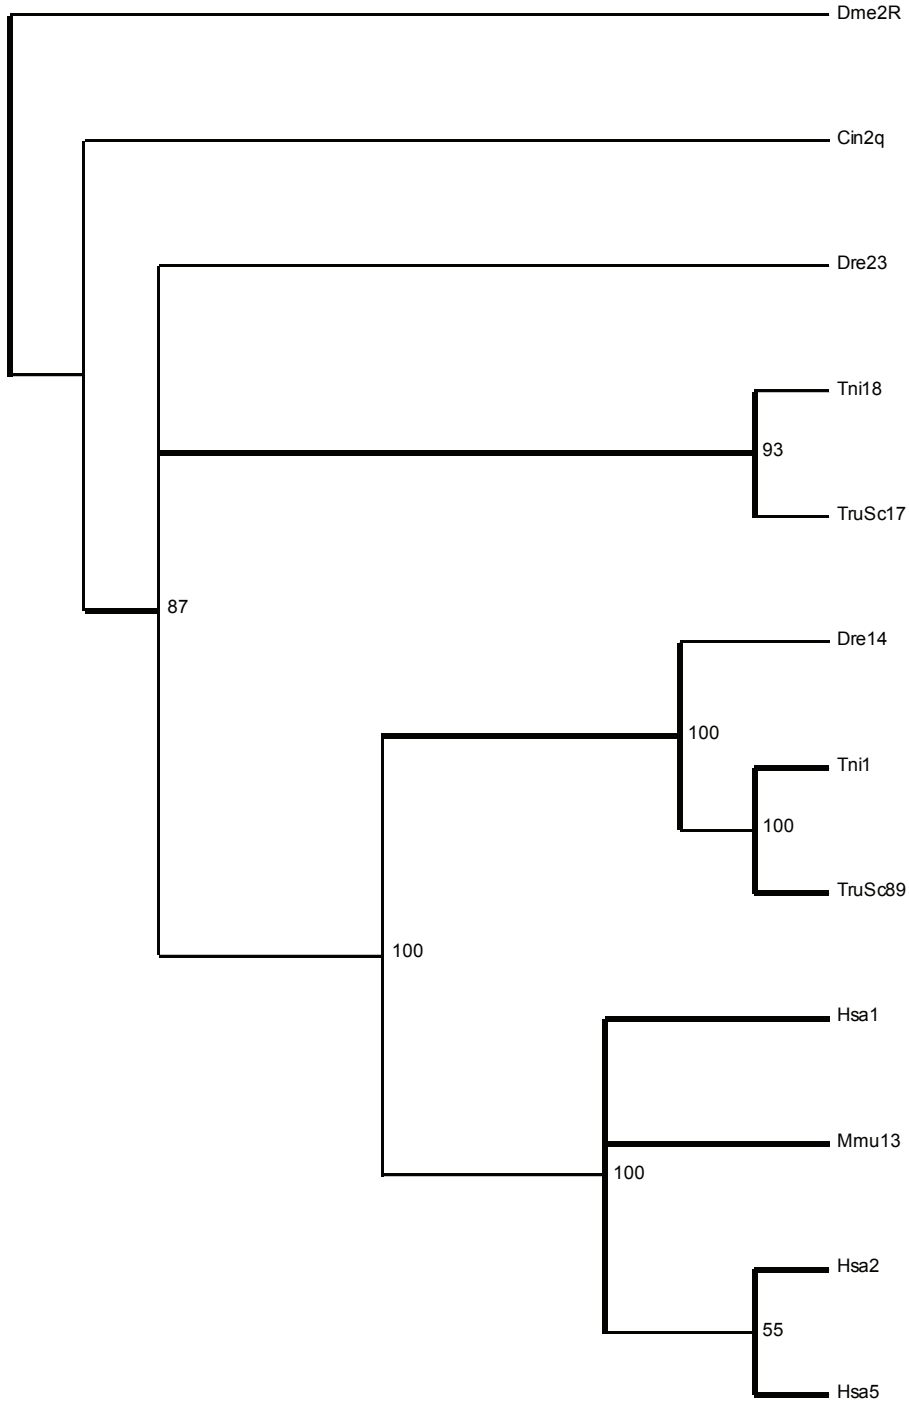

SAMD8Sub1

QP

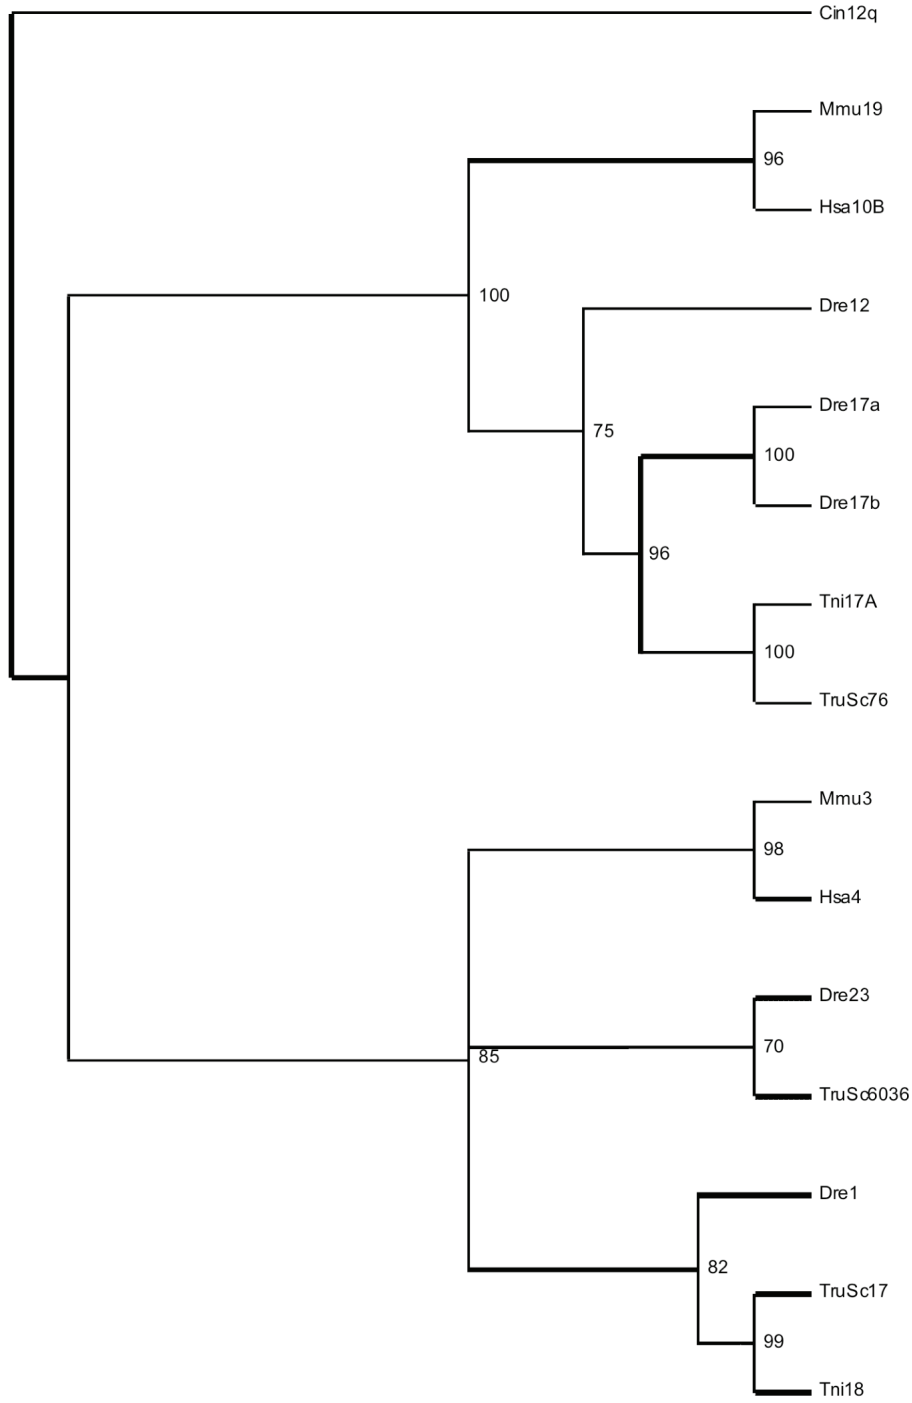

SAMD8Sub2

QP

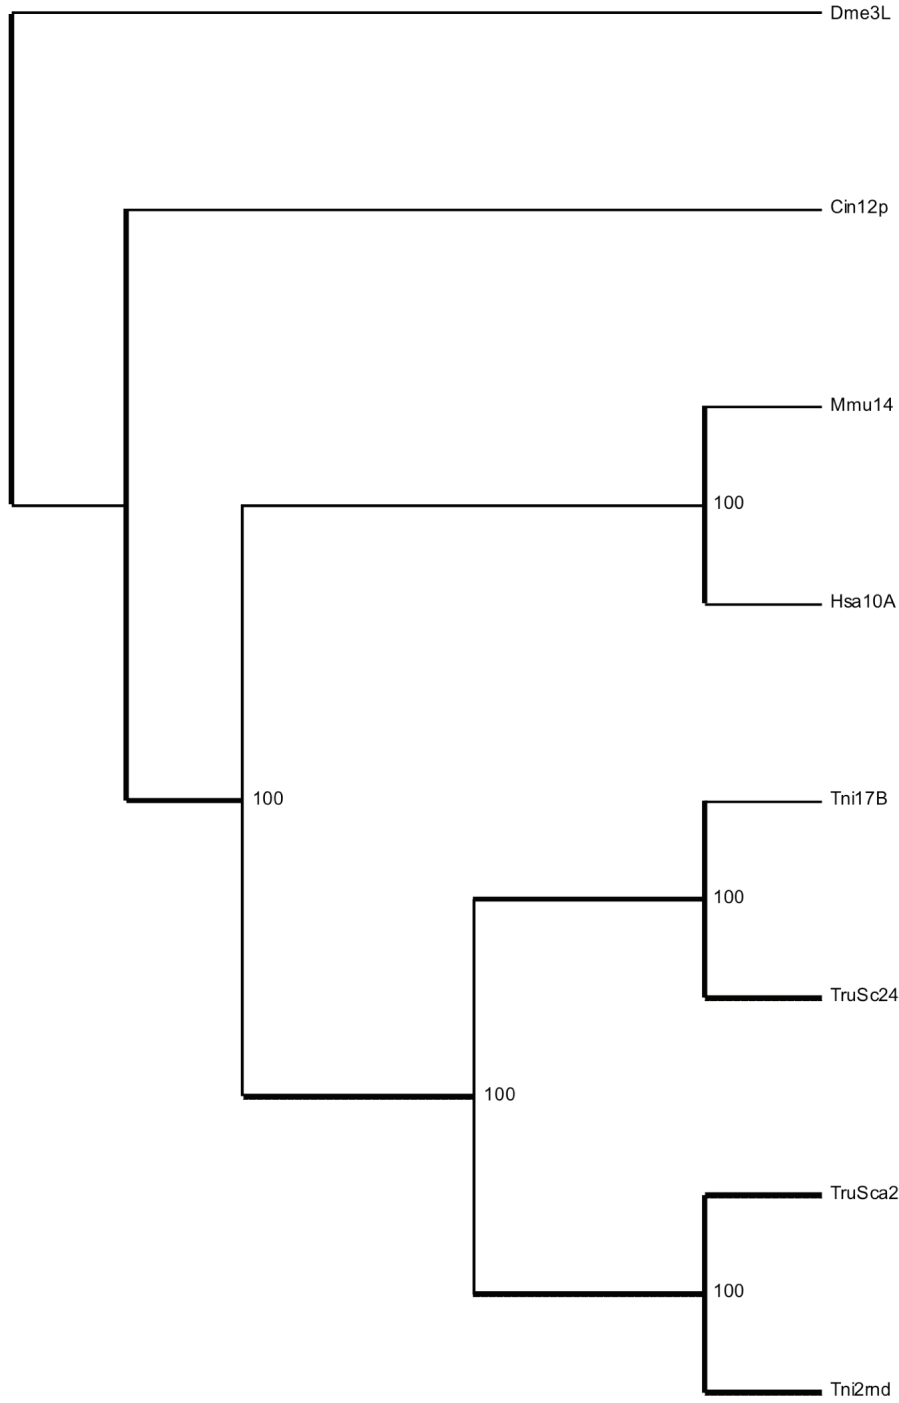

SFRP

QP

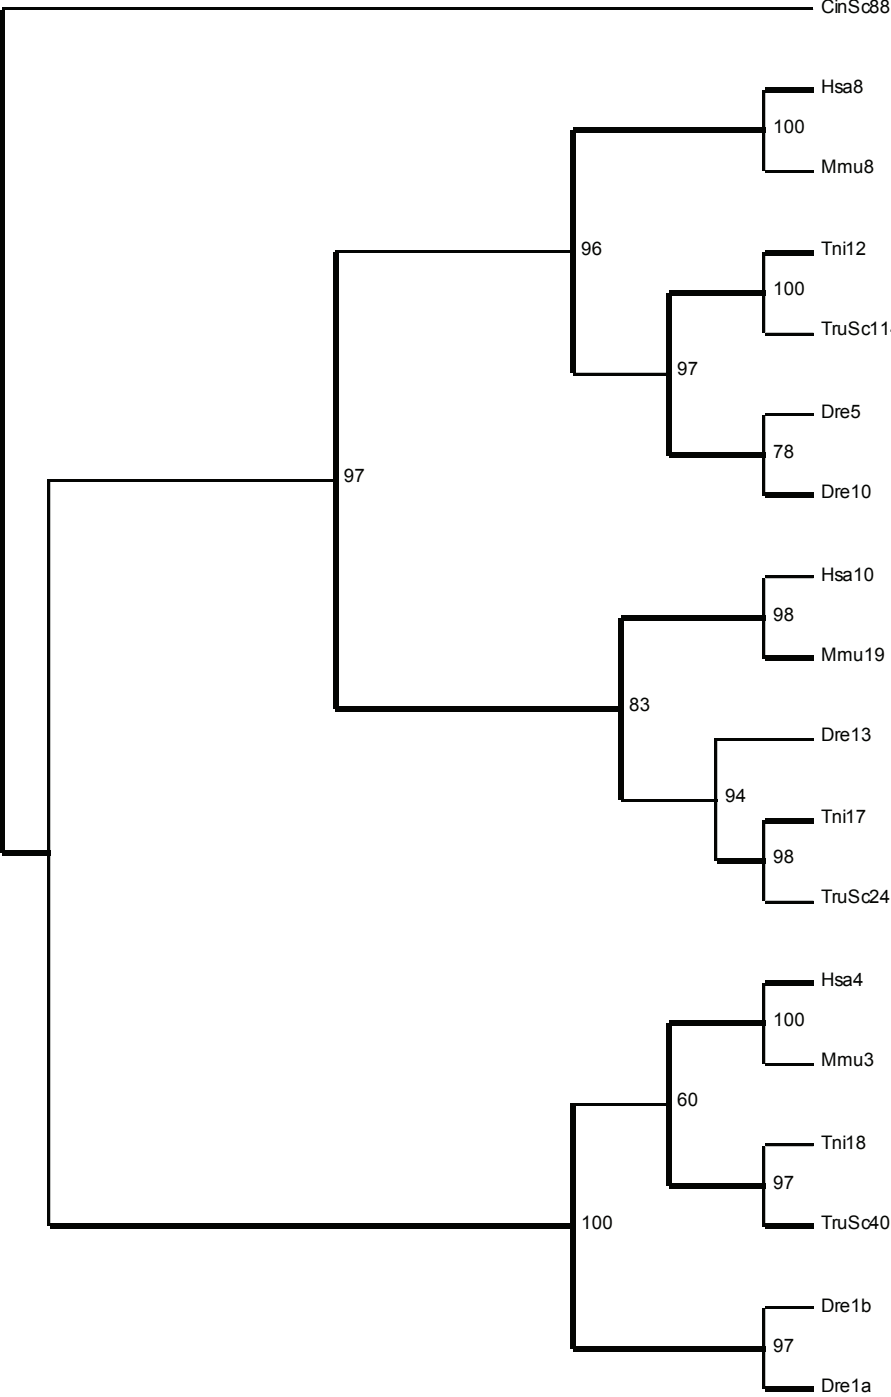

SORB

QP

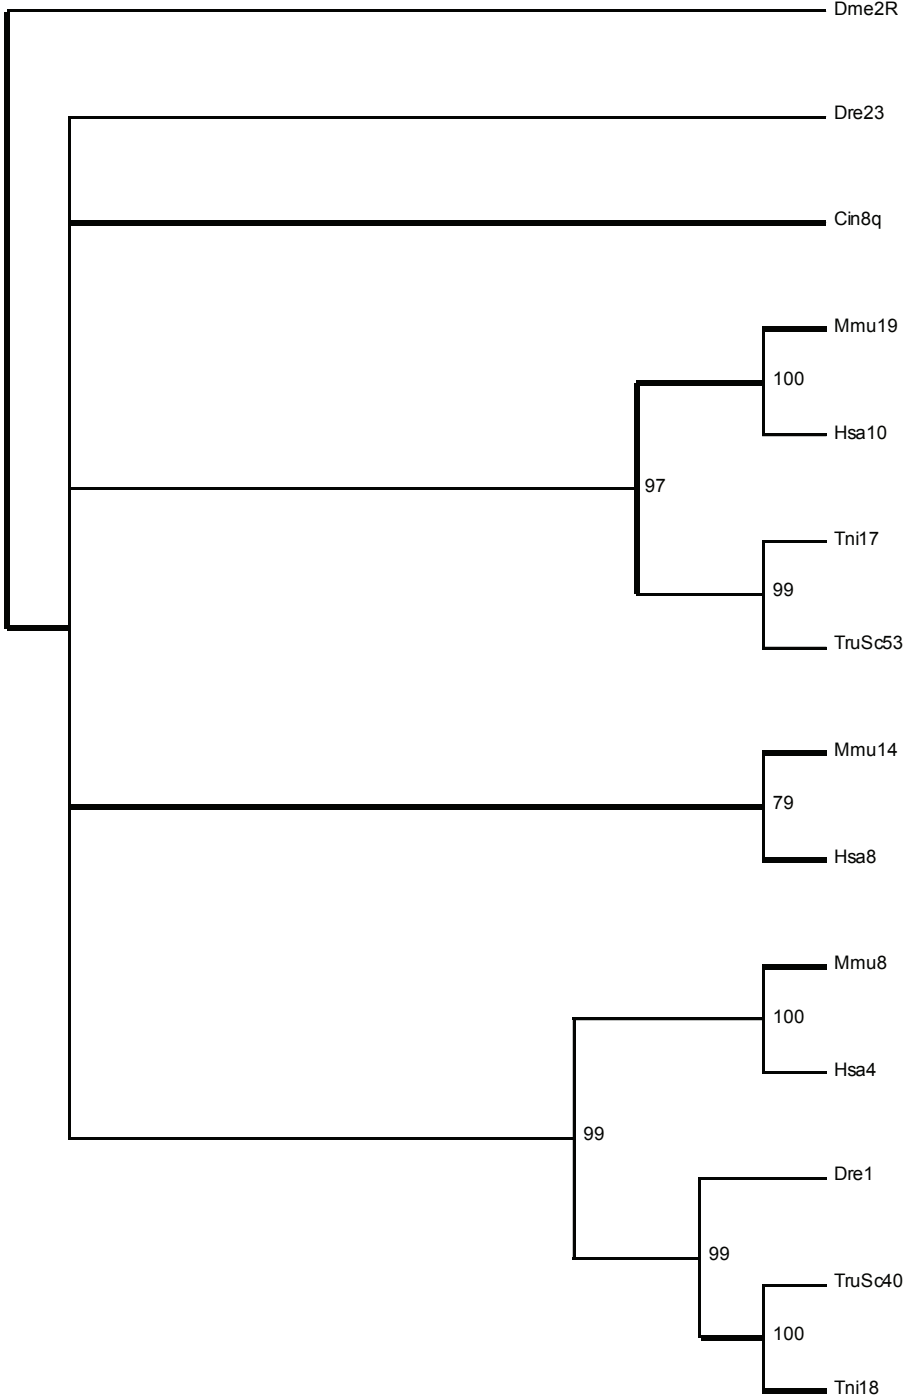

TIA

QP

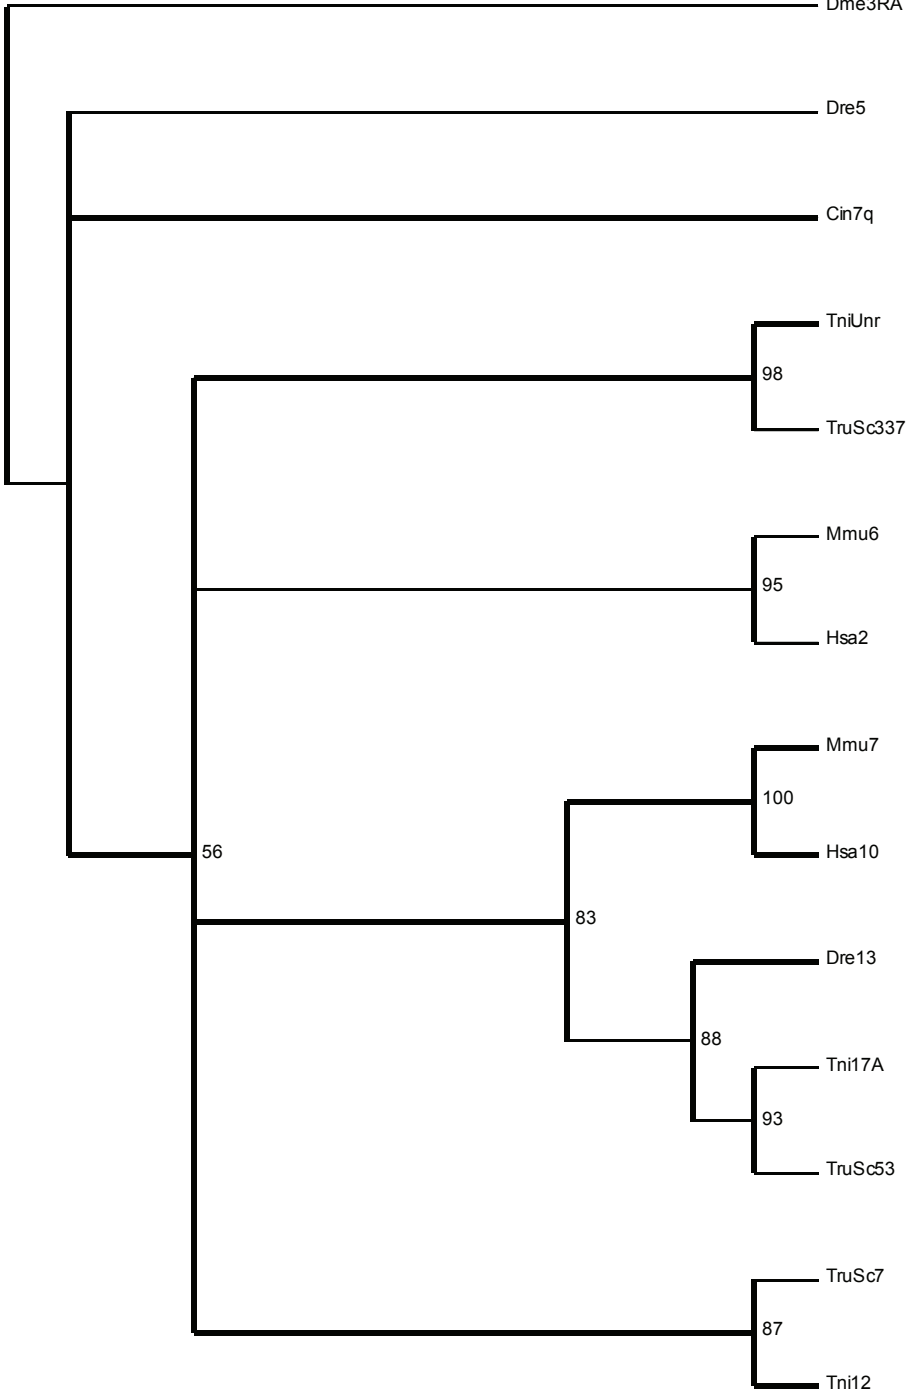

TSPAN QP

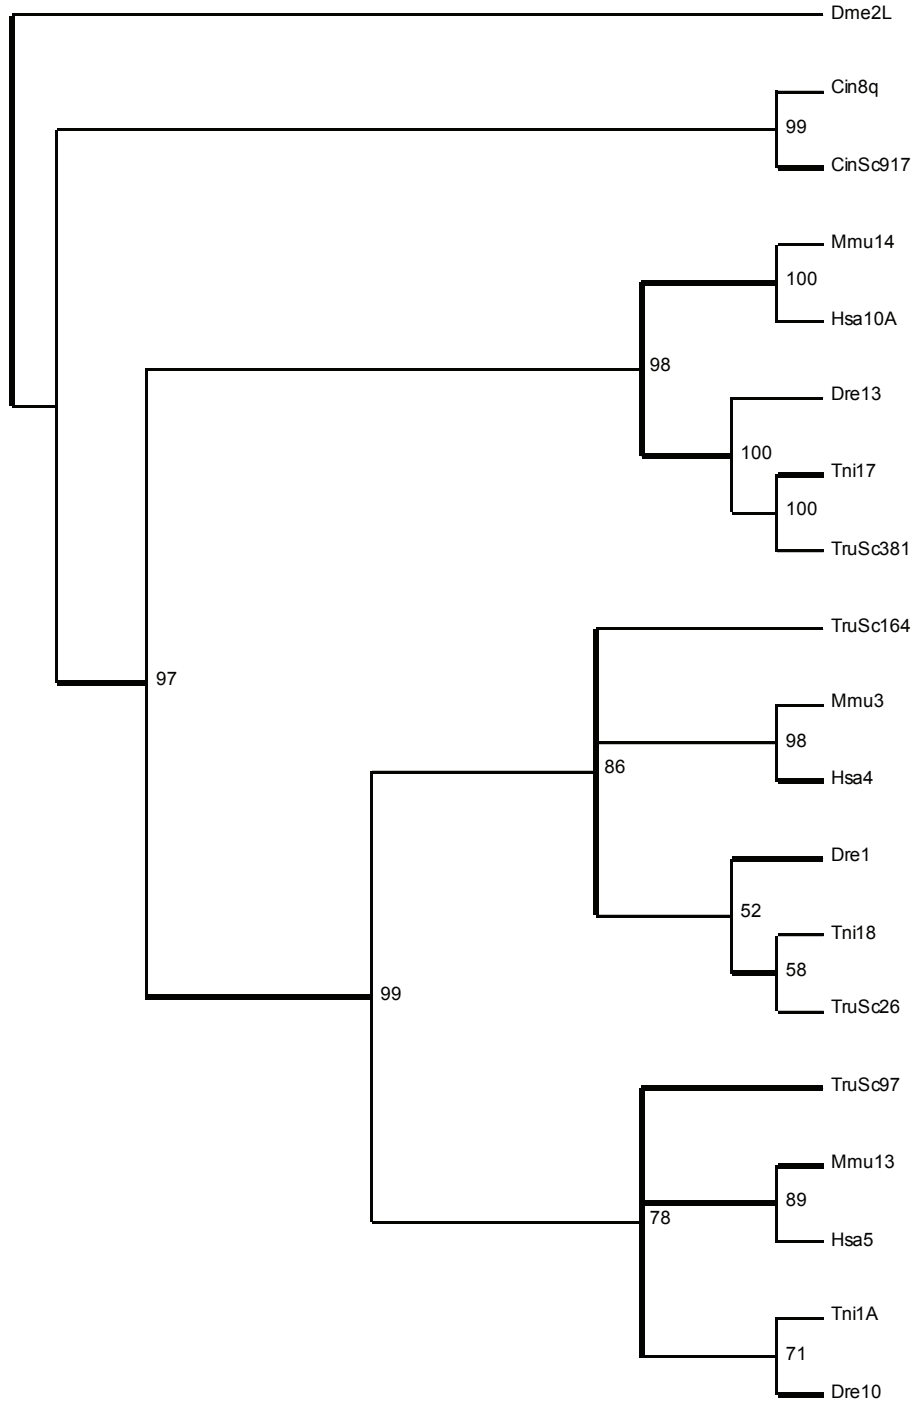

UNC5

QP

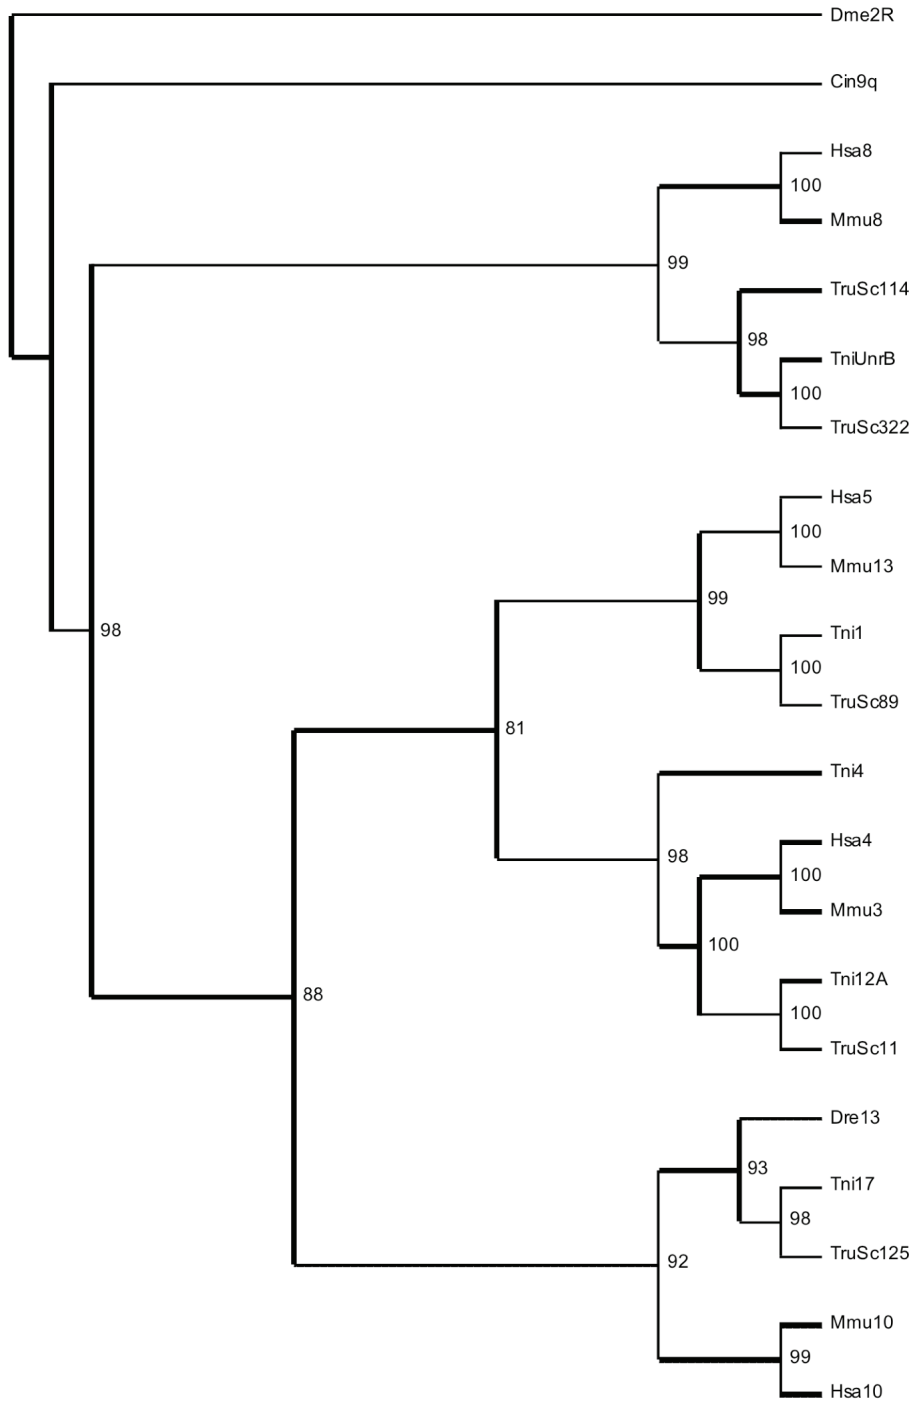



ZIMP

QP

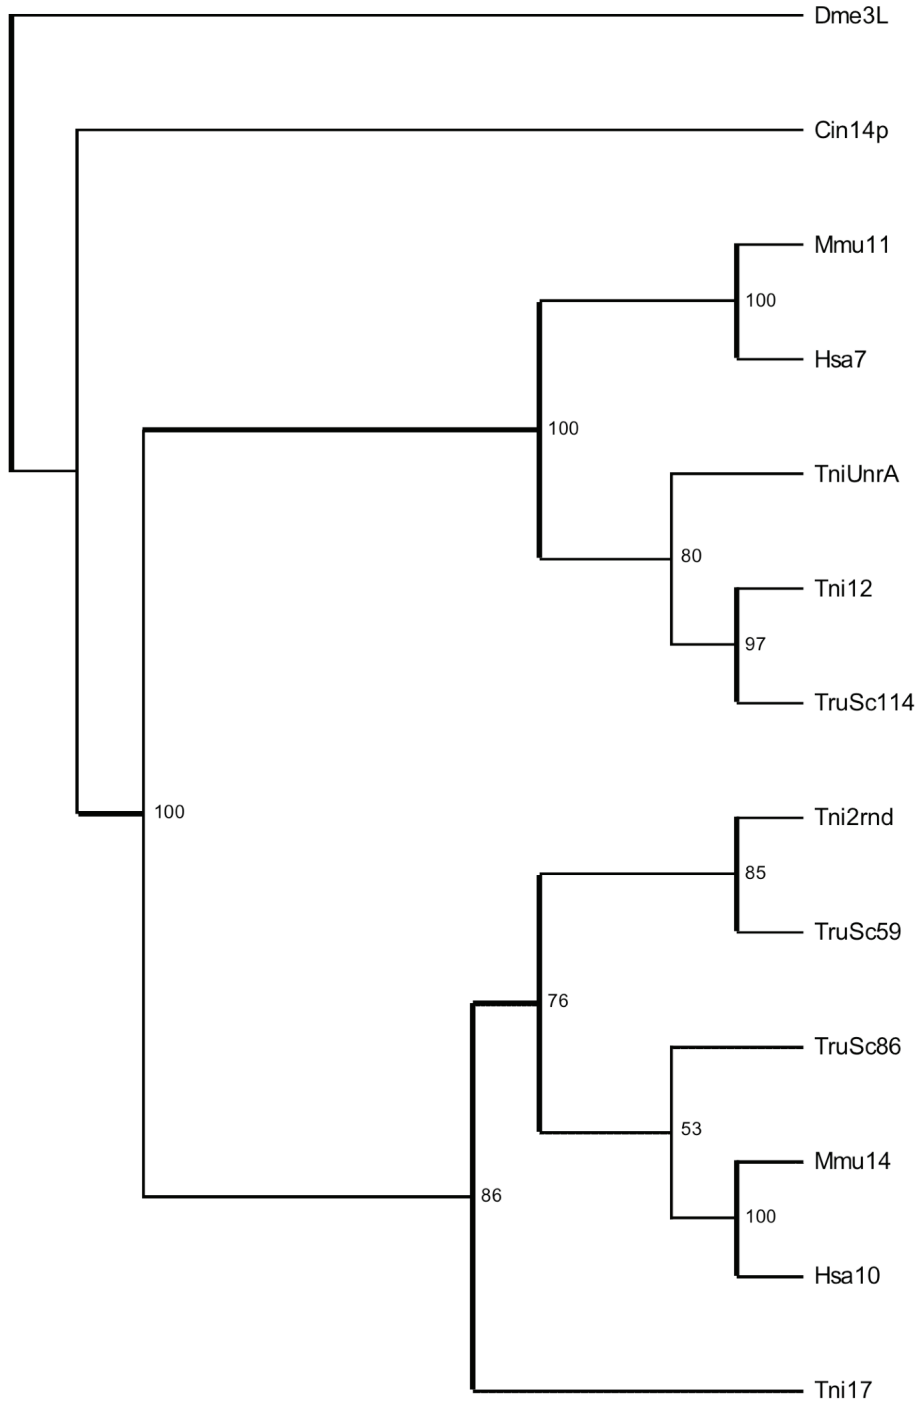

ZINK

QP

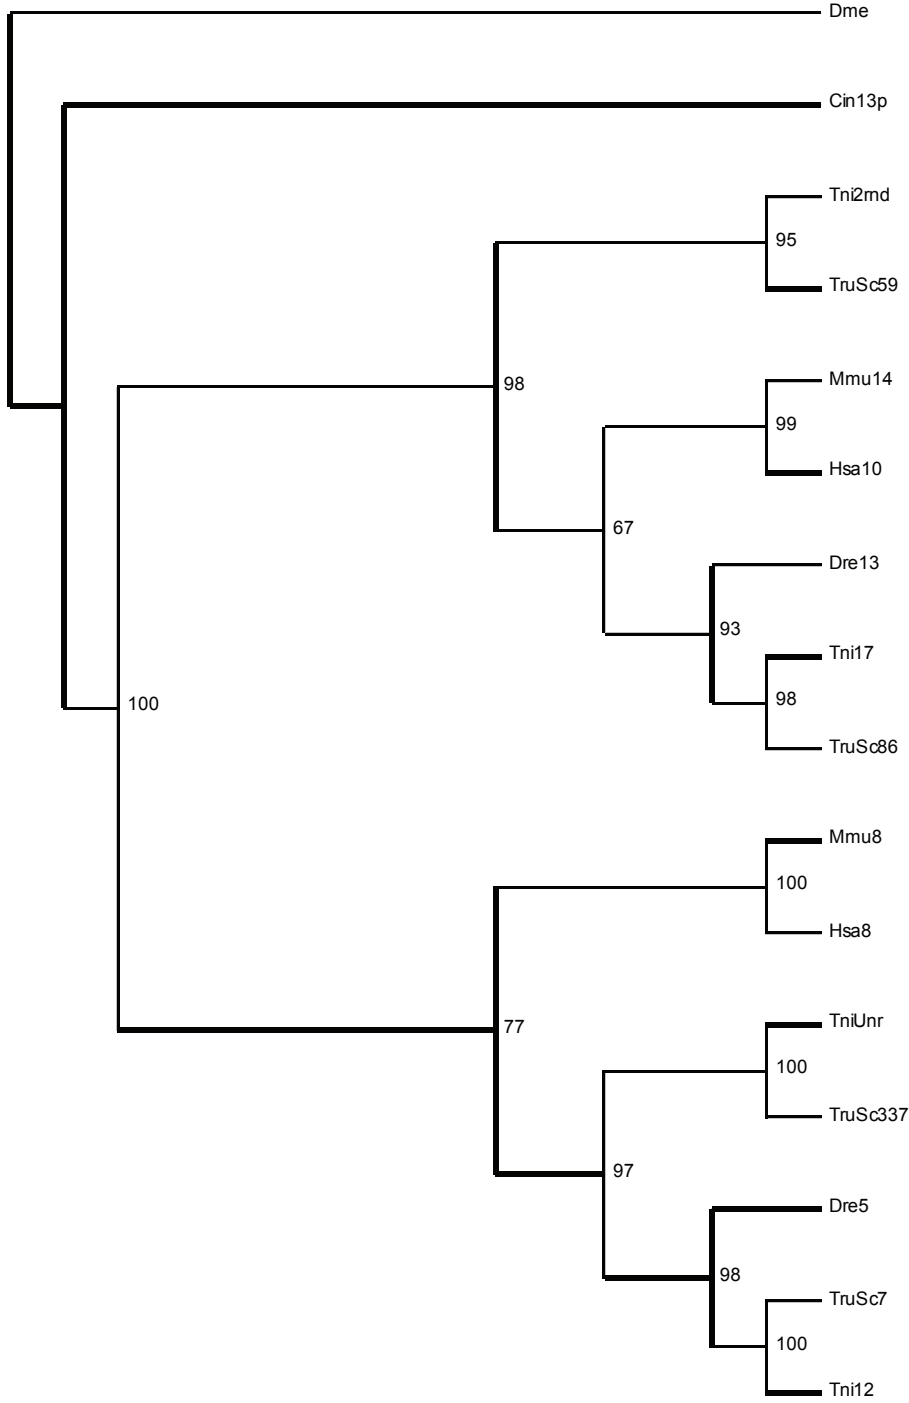

Supplement: 12862_2008_753_MOESM2_ESM.pdf [file 12862_2008_753_MOESM2_ESM.pdf]
