# Supplementary material for: Early vertebrate chromosome duplications and the evolution of the neuropeptide Y receptor gene regions
Source: Springer Nature journal article supplement (doi:10.1186/1471-2148-8-184), 2008-06-25
Supplement: 12862_2008_753_MOESM7_ESM.pdf [file 12862_2008_753_MOESM7_ESM.pdf]

**Brain**   **Eye**   **Gill**   **Heart**   **Intestine**   **Kidney**   **Liver**   **Muscle**   **Ovary**   **Spleen**   **Testis**

**Tru Y2**      **484 bp**

**Tru Y4**   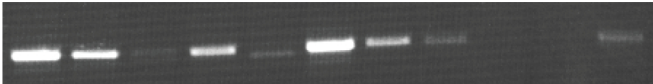   **601 bp**

**Tru Y7**   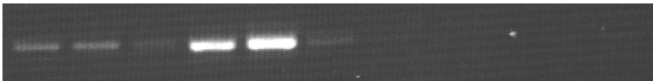   **453 bp**

**Tru Y8a**   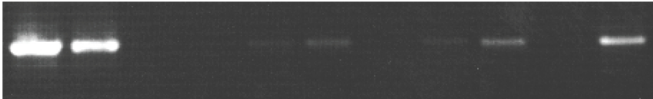   **481 bp**

**Tru Y8b**   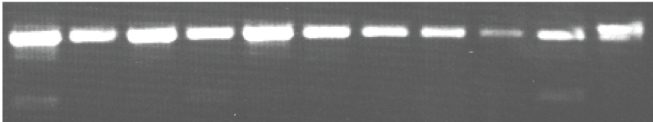   **460 bp**  
**267 bp? (a cryptic intron spliced)**

**Tru Actin**   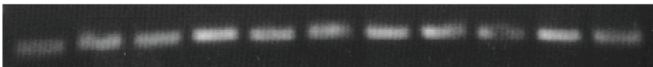   **130 bp**
