# Supplementary material for: Early vertebrate chromosome duplications and the evolution of the neuropeptide Y receptor gene regions
Source: Springer Nature journal article supplement (doi:10.1186/1471-2148-8-184), 2008-06-25

A.

*Takifugu rubripes* Y4 Extended second extracellular loop (74 aa)

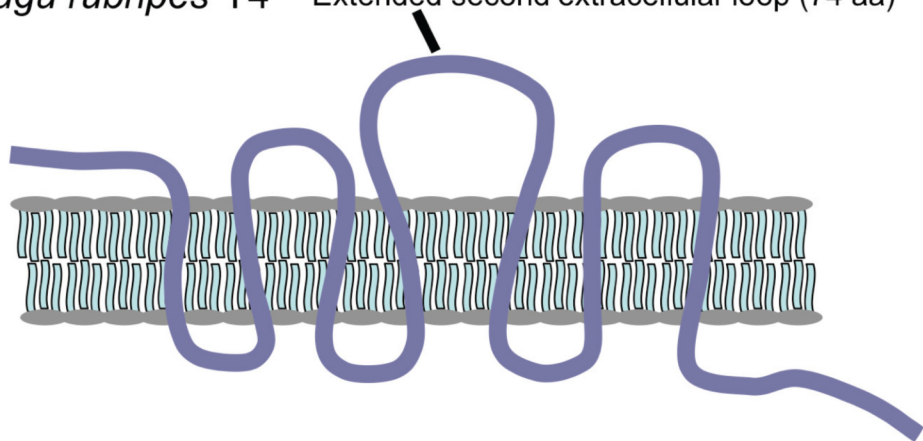

B.

*Takifugu rubripes* Y8a  
102 bp intron 2.5 kb intron (with internal 63 bp exon)

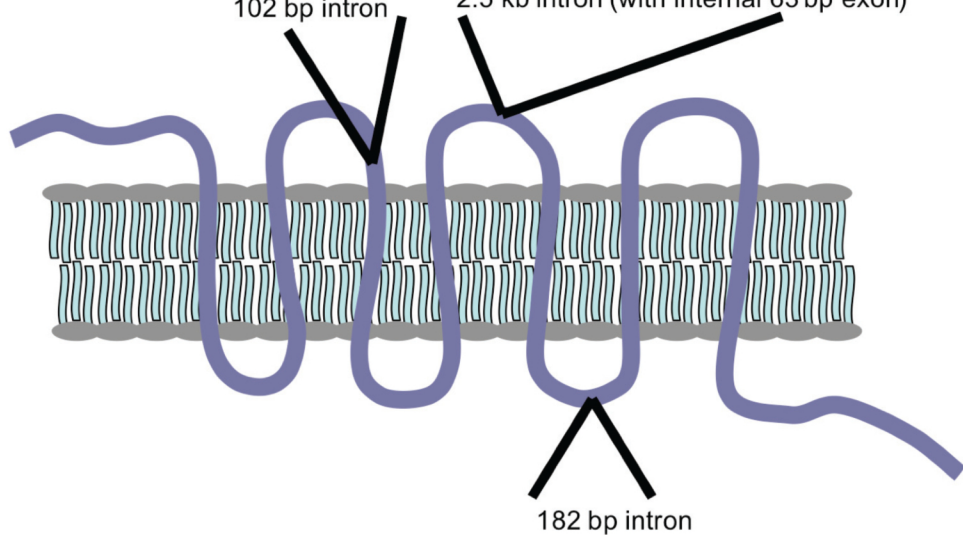

C.

*Takifugu rubripes* Y8b  
A cryptic intron (193bp) spliced in some tissues

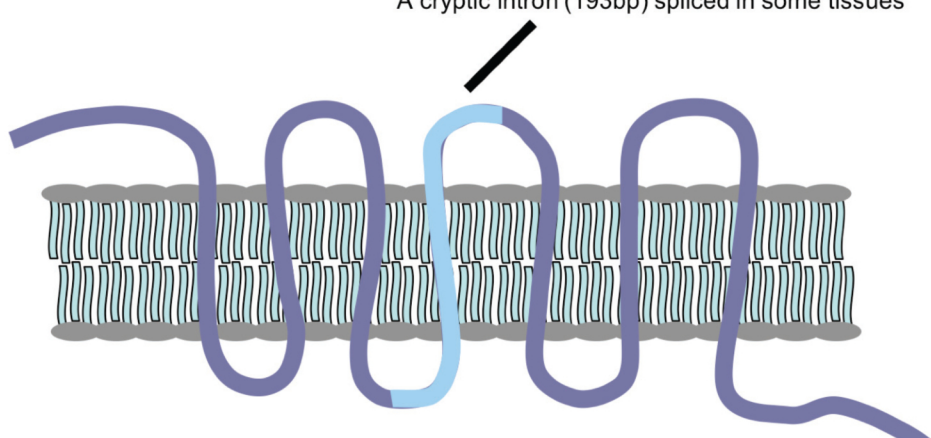

Supplement: 12862_2008_753_MOESM8_ESM.pdf [file 12862_2008_753_MOESM8_ESM.pdf]
