# Supplementary figures and images for: Early vertebrate chromosome duplications and the evolution of the neuropeptide Y receptor gene regions
Source: Springer Nature journal article supplement (doi:10.1186/1471-2148-8-184), 2008-06-25

### A. MXD

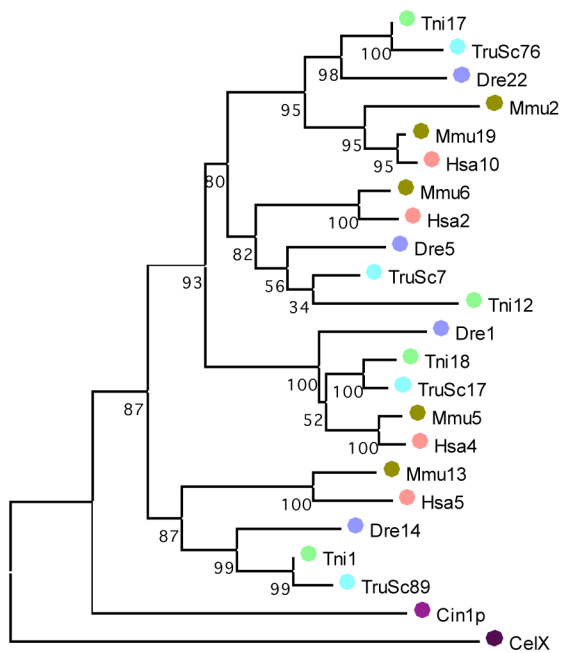

### B. NKR

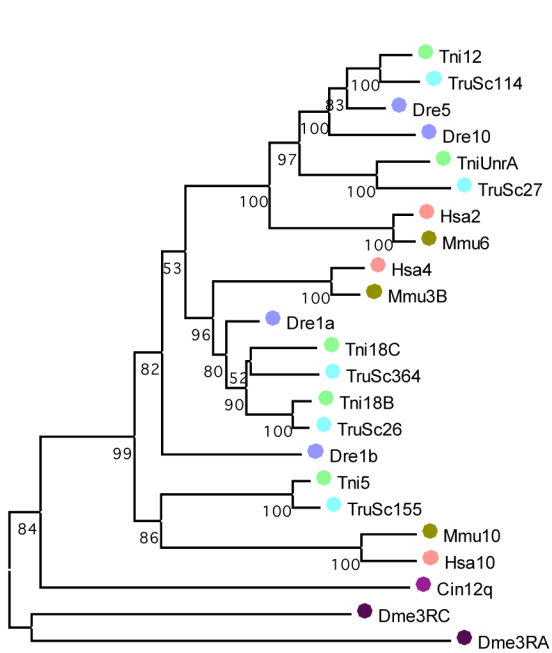

### C. OGDH

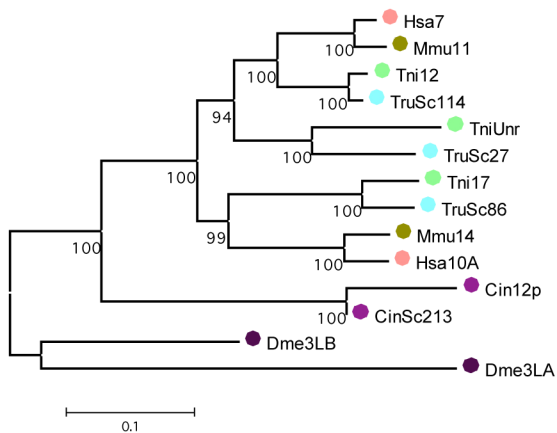

### D. PX19

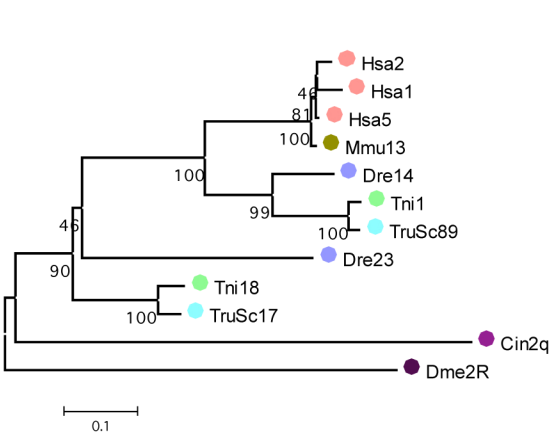

### E. SORB

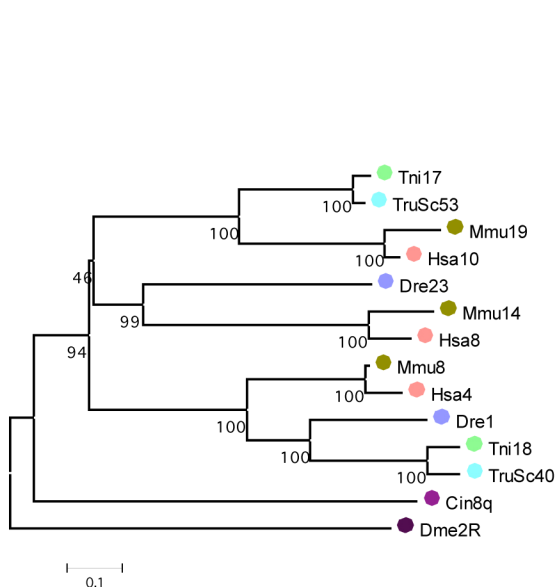

### F. TSPAN

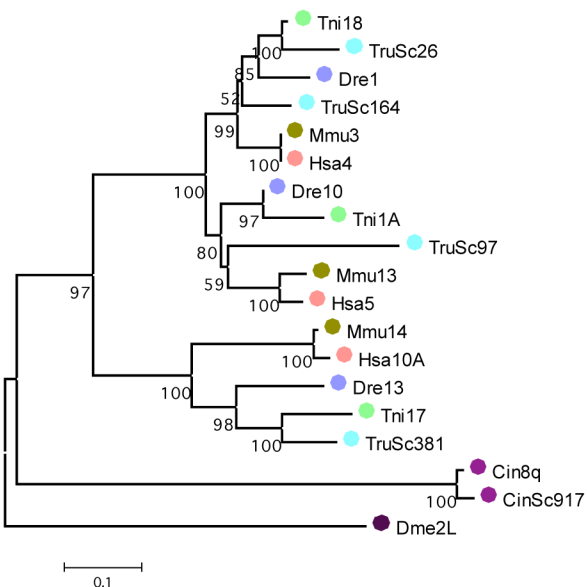

Supplement: 12862_2008_753_MOESM10_ESM.pdf [file 12862_2008_753_MOESM10_ESM.pdf]

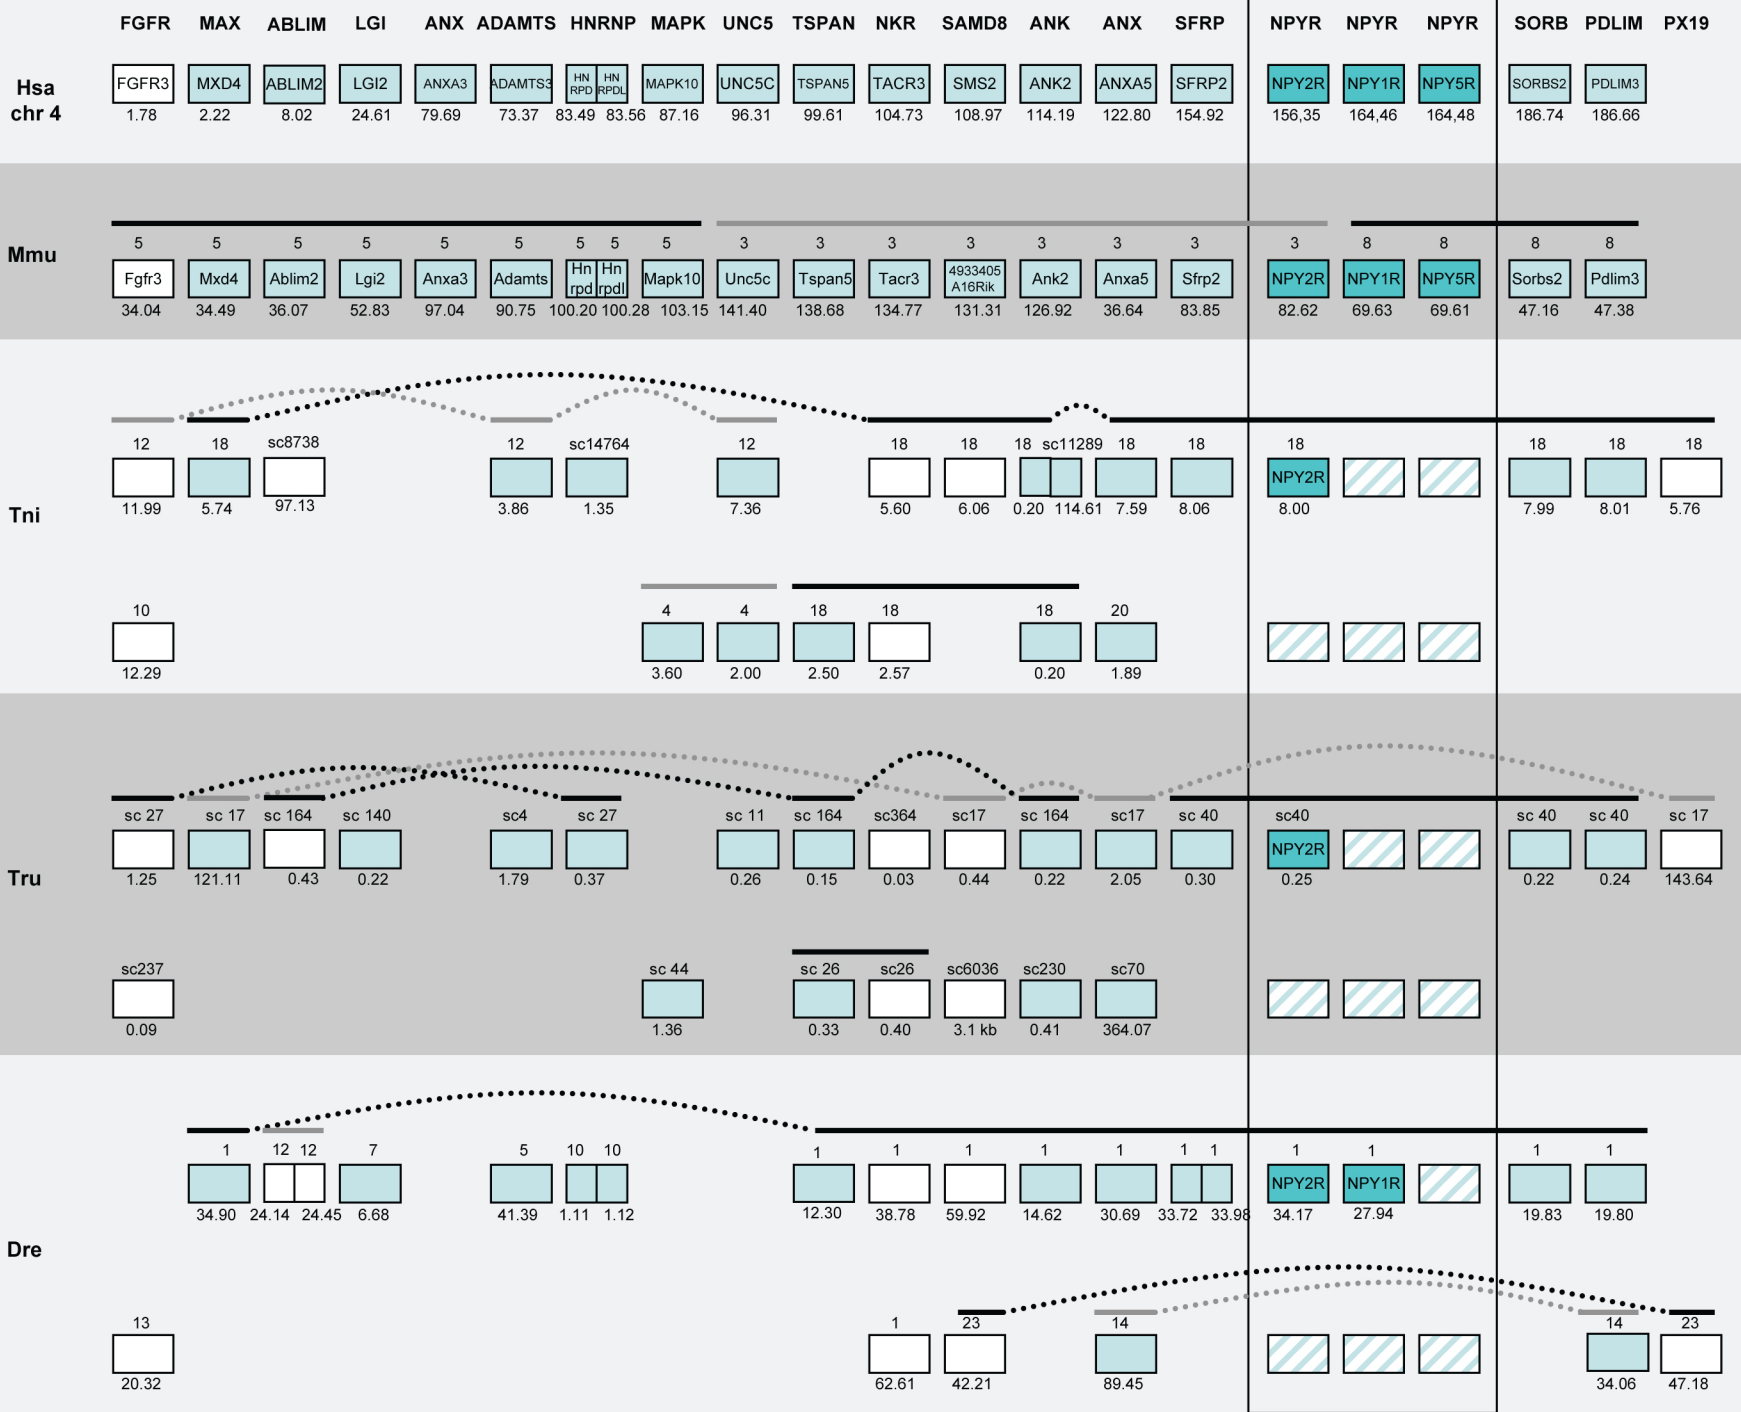

Supplement: 12862_2008_753_MOESM11_ESM.pdf [file 12862_2008_753_MOESM11_ESM.pdf]

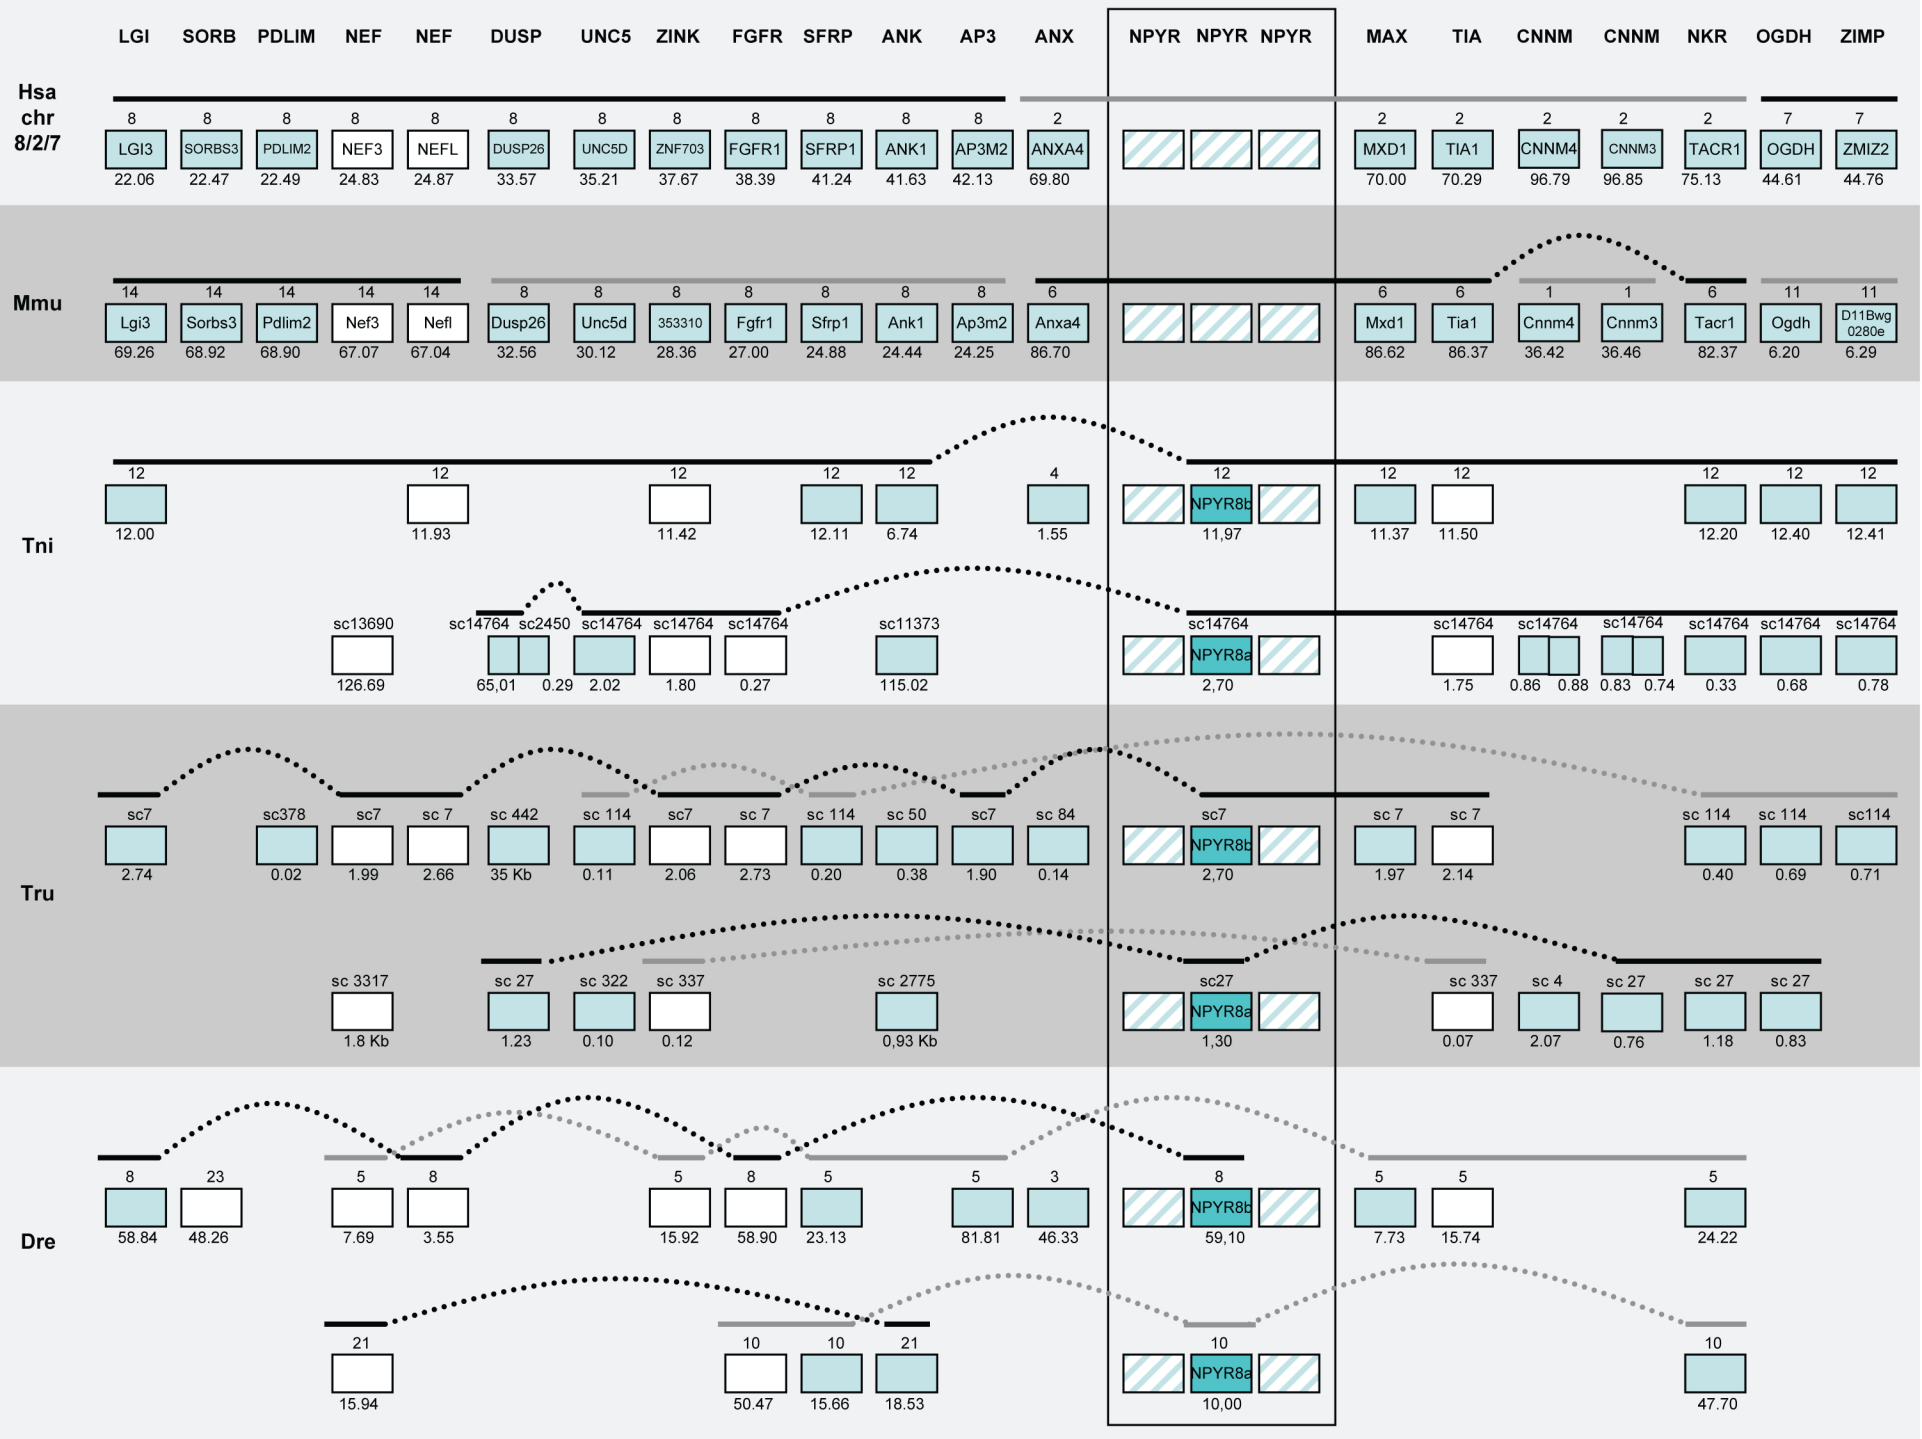

Supplement: 12862_2008_753_MOESM13_ESM.pdf [file 12862_2008_753_MOESM13_ESM.pdf]

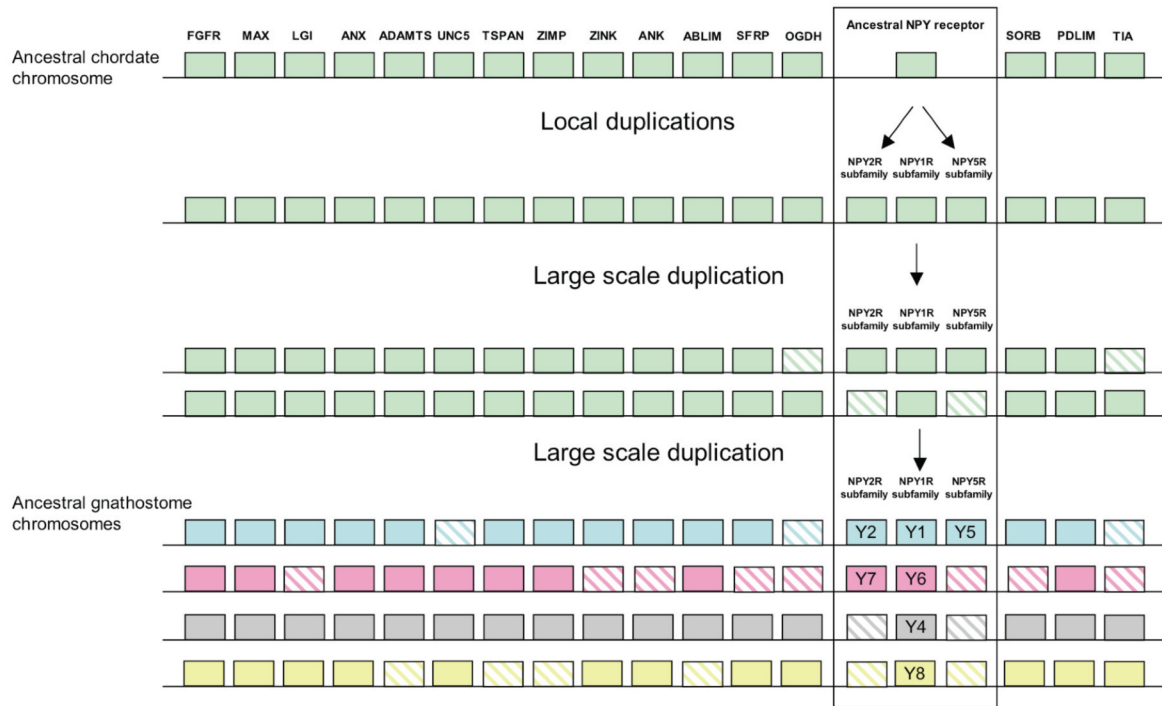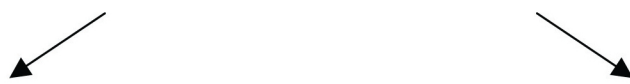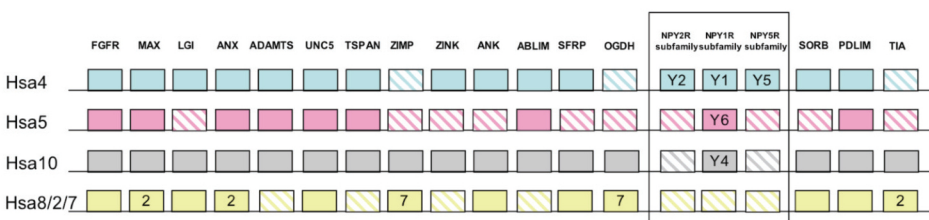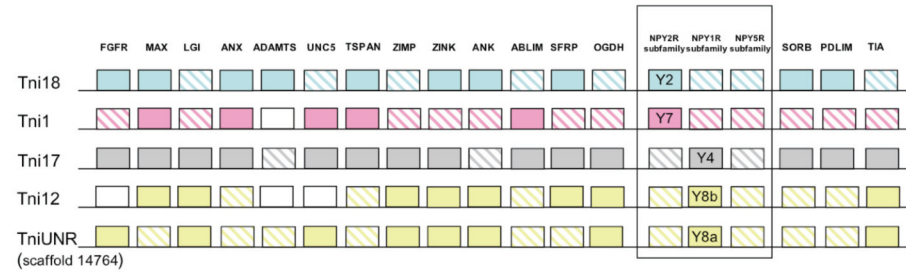

Supplement: 12862_2008_753_MOESM15_ESM.pdf [file 12862_2008_753_MOESM15_ESM.pdf]

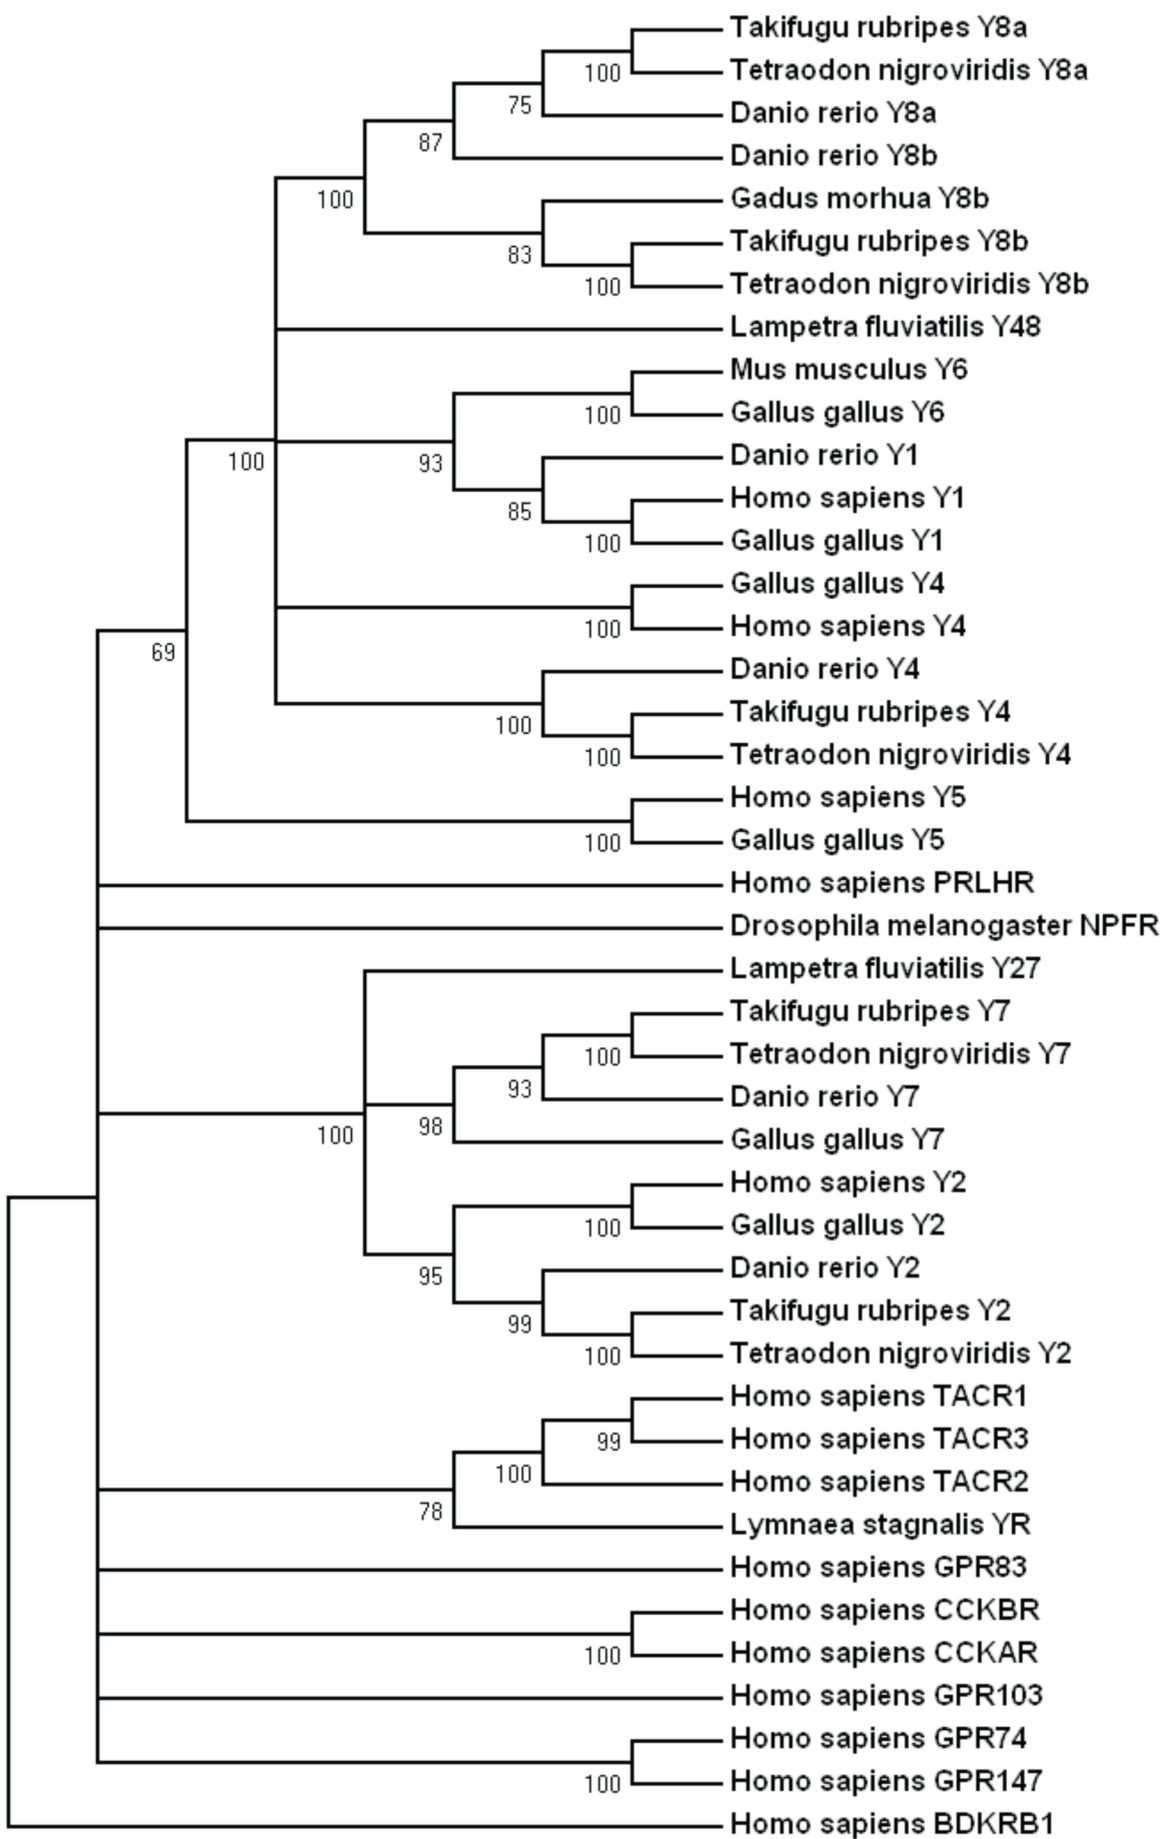

Supplement: 12862_2008_753_MOESM6_ESM.pdf [file 12862_2008_753_MOESM6_ESM.pdf]

### A. ABLIM

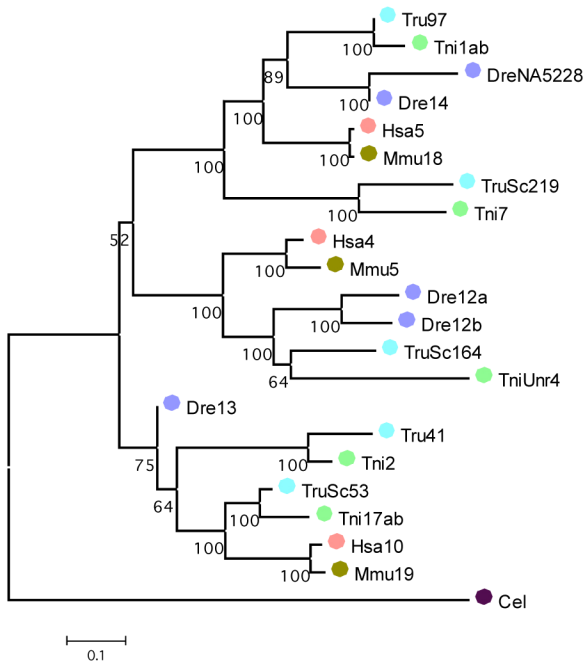

### B. ADAMTS

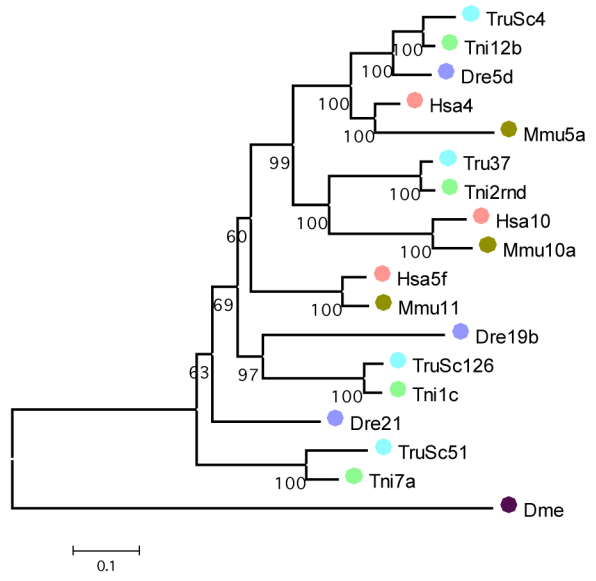

### C. AP3

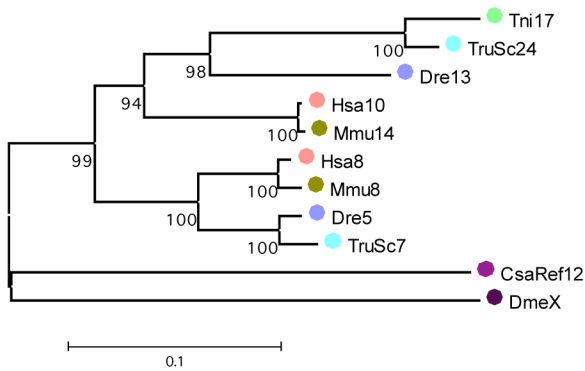

### D. ZIMP

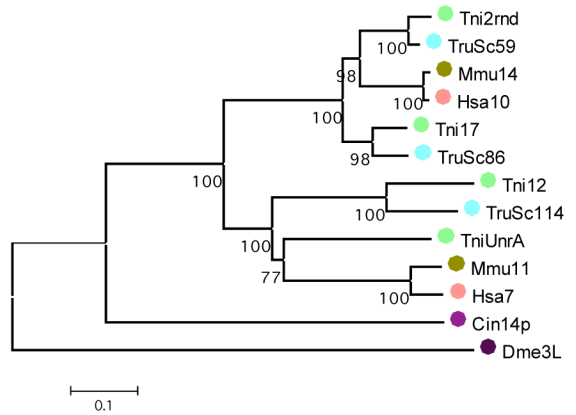

### E. HNRNP

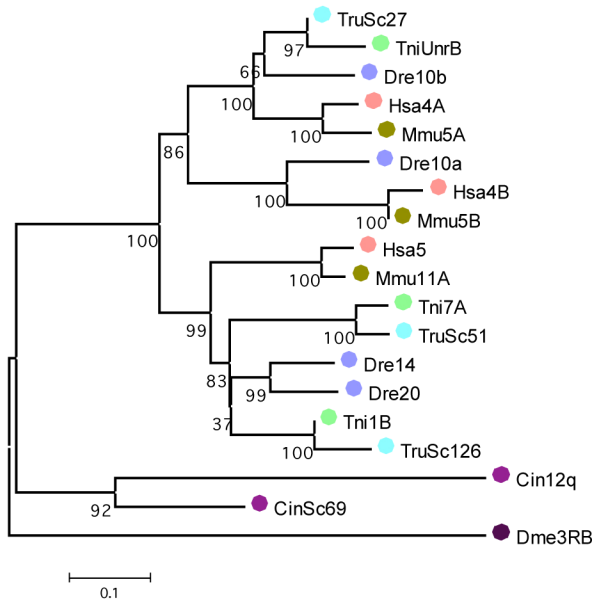

### F. LGI

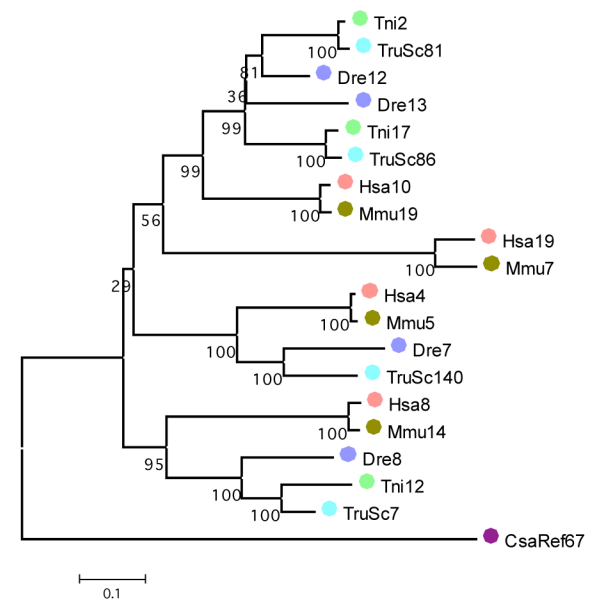

Supplement: 12862_2008_753_MOESM9_ESM.pdf [file 12862_2008_753_MOESM9_ESM.pdf]
